# Supplementary material
Source: PubMed Central journal article supplement (PMC7228131)
Supplement: ehp6262.s001.acco.pdf [file ehp6262.s001.acco.pdf]

**Note to readers with disabilities:** *EHP* strives to ensure that all journal content is accessible to all readers. However, some figures and Supplemental Material published in *EHP* articles may not conform to [508 standards](#) due to the complexity of the information being presented. If you need assistance accessing journal content, please contact [ehp508@niehs.nih.gov](mailto:ehp508@niehs.nih.gov). Our staff will work with you to assess and meet your accessibility needs within 3 working days.

### **Supplemental Material**

#### **Evaluating the Role of the Steroid and Xenobiotic Receptor (SXR/PXR) in PCB-153 Metabolism and Protection against Associated Adverse Effects during Perinatal and Chronic Exposure in Mice**

Riann Jenay Egusquiza, Maria Elena Ambrosio, Shuyi Gin Wang, Kaelen Marie Kay, Chunyun Zhang, Hans-Joachim Lehmler, and Bruce Blumberg

#### **Table of Contents**

**Table S1.** Breeding Results.

**Table S2.** qPCR primer sequences.

**Table S3.** Proportion of deaths at 5 weeks of age in WT, hSXRki, and SXRKO mice exposed to PCB-153 or vehicle in chronic exposure study.

**Table S4.** Wild-type blood parameters over time in chronic exposure study.

**Table S5.** SXRKO blood parameters over time in chronic exposure study.

**Figure S1.** Blood hemoglobin levels throughout lifespan.

**Figure S2.** Relative liver and spleen weights of dams and pups from perinatal PCB-153 exposure study.

**Figure S3.** Gene Ontology (GO) term enrichment of spleen RNA-seq data set comparing SXRKO mice exposed to PCB-153 vs SXRKO mice exposed to vehicle (DMSO) in perinatal exposure study.

**Figure S4.** qPCR validation of select differentially expressed genes (DEGs) related to erythrocyte development and heme metabolism in the spleen.

**Figure S5.** Correlation plots of mRNA expression of erythrocyte development and heme metabolism genes with level of erythropoiesis in the spleen of SXRKO mice exposed to PCB-153.

**Figure S6. PCB-153 *ex vivo* hemolysis assay.**

**Figure S7. qPCR validation of differentially expressed genes (DEGs) related to oxidative stress in the spleen of SXRKO mice exposed to PCB-153 vs vehicle (DMSO).**

**Figure S8. DNA repair genes in the spleen of WT and SXRKO mice exposed to vehicle or PCB-153.**

**Figure S9. Gene Ontology (GO) term enrichment of liver RNA-seq dataset comparing SXRKO vs wild-type mice exposed to vehicle (DMSO).**

**Figure S10. Differential expression of genes related to transmembrane transporter activity between WT and SXRKO mice with DMSO and PCB-153 exposure.**

**Figure S11. Differential expression of various UGT and SULT genes between livers of WT and SXRKO mice with DMSO and PCB-153 exposure.**

**Figure S12. Tumor images, body weights, and spleen weights of mice chronically exposed to PCB-153.**

**RNA-seq script**

**RNA quality: Bioanalyzer (Agilent Bioanalyzer 2100) results for RNA used for RNA-seq**

**Additional File- Excel Document**

**Table S1: Breeding Results**

| <b>F1 male exposure until 4 weeks of age</b>   |                             |                     |                                  |                                 |                                                 |
|------------------------------------------------|-----------------------------|---------------------|----------------------------------|---------------------------------|-------------------------------------------------|
|                                                | <i># F0 female breeders</i> | <i># of litters</i> | <i># pups/litter (avg ± SEM)</i> | <i># F1 male offspring born</i> | <i># F1 male offspring used for experiments</i> |
| <i>WT DMSO</i>                                 | 9                           | 6                   | 6.71 ± 0.29                      | 22                              | 19                                              |
| <i>WT PCB</i>                                  | 9                           | 9                   | 6.33 ± 0.50                      | 27                              | 18                                              |
| <i>SXRKO DMSO</i>                              | 6                           | 5                   | 6.40 ± 0.68                      | 17                              | 16                                              |
| <i>SXRKO PCB</i>                               | 7                           | 4                   | 7.00 ± 0.41                      | 13                              | 13                                              |
| <b>F1 male exposure until 10 months of age</b> |                             |                     |                                  |                                 |                                                 |
|                                                | <i># F0 female breeders</i> | <i># of litters</i> | <i># pups/litter (avg ± SEM)</i> | <i># F1 male offspring born</i> | <i># F1 male offspring used for experiments</i> |
| <i>WT DMSO</i>                                 | 10                          | 6                   | 6.50 ± 0.92                      | 20                              | 14                                              |
| <i>WT PCB</i>                                  | 10                          | 7                   | 6.71 ± 0.42                      | 24                              | 23                                              |
| <i>SXRKO DMSO</i>                              | 17                          | 12                  | 6.58 ± 0.51                      | 43                              | 33                                              |
| <i>SXRKO PCB</i>                               | 18                          | 16                  | 6.25 ± 0.47                      | 42                              | 40                                              |
| <i>hSXRki DMSO</i>                             | 8                           | 4                   | 5.67 ± 0.71                      | 15                              | 14                                              |
| <i>hSXRki PCB</i>                              | 8                           | 6                   | 6.25 ± 0.63                      | 18                              | 15                                              |

Notes: Some F1 males were not used for exposure experiments because they died shortly after birth, were runts, or died at 5 weeks of age, as noted in the Results section. The numbers for the F1 SXRKO mice in the chronic exposure study (until 10 months old) are the sum between two independent experiments: 1) comparing SXRKO (n= 15 DMSO; 13 PCB) and hSXRki mice and 2) comparing SXRKO (n= 18 DMSO; 27 PCB) and WT mice. WT= wildtype; SXRKO= SXR knockout; hSXRki= humanized SXR knock-in; DMSO= exposure to 0.1% DMSO (vehicle) via drinking water; PCB= exposure to 1 µM PCB-153 via drinking water.

**Table S2: qPCR primer sequences**

| <b>Gene<br/>(mouse)</b> | <b>Forward primer</b>    | <b>Reverse primer</b>    |
|-------------------------|--------------------------|--------------------------|
| 36B4/Rplp0              | AAGCGCGTCCTGGCATTGTCT    | CCGCAGGGGCAGCAGTGGT      |
| Actb                    | GGCTGTATTCCCCTCCATCG     | CCAGTTGGTAACAATGCCATGT   |
| Fech                    | GACCGAGACCTCATGACACTTCC  | ATAACTCATCCAGCAGCTTCACCA |
| Klf1                    | GAGCCCTCCAAGAACTTTCCT    | TCAGACCGCCACC ACTTGAG    |
| Epor                    | CGGGATGGACTTCAACTACAGC   | AACACCAGAAACGCACGGAG     |
| Prxd2                   | GGACTACAGAGGGAAGTACG     | TGAACTGAGAGTCCACAGAC     |
| Gpx1                    | CGTTTGAGTCCCAACATCTC     | ATCGTTCATCTCGGTGTAGTC    |
| Gstp1                   | TCCTTTGCCGATTACA ACTTGC  | AGTCCACTACTGTTTGCCATTGC  |
| Gadd45a                 | GCTGCTACCTCTGCTTACCTCTG  | CCTTCCATTGTGATGAATGTGGGT |
| Rad23a                  | AGATGTTGAATGAGCCTCCCG    | TGCCTTCAGCCTTCTATAGCC    |
| Blvrb                   | CAGGTTATGAGGTGACGGTG     | CCACAGTCTTGTCCACATCGG    |
| Gstp3                   | GTGACCTTGGATGTTTGGGAGC   | CTTTGCCATAGAGCCCGAAGGA   |
| Mgst3                   | TACAGCACAGATCCTGAGAACG   | TAAACACCTCCCACCGTTAGGA   |
| Epb42                   | GACAGTCCTTCACTATCACCTTG  | TGGCTTGGGTCTTATTGATCTTGG |
| Alad                    | CAGTGCCTCCAACCTCATCTATCC | GACGCCAAAGATCAGGACACAG   |
| Hbq1b                   | AGACTTCAGCCCAGAGATGC     | GAGACTATAGAACCCTGTATCCC  |
| Fam213a                 | GCAGACCTGATGTCCTTGAAGC   | ATGAACATCATCTTCCGCCTCTC  |
| Cyp2b10                 | GTGCCACAGACAAATCTCCA     | GGACTTCTCCTTCTCCATGCG    |

Notes: 36B4/Rplp0: ribosomal protein, large, P0; Actb:  $\beta$ -actin; Fech: ferrochelatase; Klf1: kruppel-like factor 1; Epor: erythropoietin receptor; Prxd2: peroxiredoxin 2; Gpx1: glutathione peroxidase; Gstp1: glutathione S-transferase pi 1; Gadd45a: growth arrest and DNA damage inducible alpha; Rad23a: RAD23 Homolog A; Blvrb: biliverdin B; Gstp3: glutathione S-transferase pi 3; Mgst3: microsomal glutathione S-transferase 3; Epb42: erythrocyte membrane protein band 4.2; Alad:  $\delta$ -aminolevulinic acid dehydratase; Hbq1b: hemoglobin subunit theta 1B; Fam213a: peroxiredoxin-like 2A; Cyp2b10: cytochrome P450, family 2, subfamily b, polypeptide 10

**Table S3: Proportion of deaths at 5 weeks of age in WT, hSXRki, and SXRKO mice exposed to PCB-153 or vehicle in chronic exposure study**

|                 |        | <b>DMSO</b> | <b>PCB-153</b>      |
|-----------------|--------|-------------|---------------------|
| <b>COHORT 1</b> | WT     | 0/6 (0%)    | 0/13 (0%)           |
|                 | SXRKO  | 0/15 (0%)   | <b>3/16 (18.8%)</b> |
| <b>COHORT 2</b> | WT     | 0/8 (0%)    | 0/10 (0%)           |
|                 | SXRKO  | 0/3 (0%)    | <b>2/11 (18.2%)</b> |
| <b>COHORT 3</b> | hSXRki | 0/14 (0%)   | 0/15 (0%)           |
|                 | SXRKO  | 0/15 (0%)   | 0/13 (0%)           |

Notes: WT= wildtype; SXRKO= SXR knockout; hSXRki= humanized SXR knock-in; DMSO= exposure to 0.1% DMSO (vehicle) via drinking water; PCB= exposure to 1  $\mu$ M PCB-153 via drinking water.

**Table S4: Wild-type blood parameters over time in chronic exposure study**

|                                            | Week 6           |                 | Week 21-22       |                 | Week 30          |                 | Week 40          |                 |
|--------------------------------------------|------------------|-----------------|------------------|-----------------|------------------|-----------------|------------------|-----------------|
|                                            | WT DMSO<br>n= 14 | WT PCB<br>n= 23 |
| <b>WBC(10<sup>3</sup>/mm<sup>3</sup>)</b>  | 14.8±2.8         | 14.8±3.7        | 22±10.4          | 24.1±6.1        | 23.5±5.5         | 26.7±5.5        | 26.5±6.2         | 26.3±3.6        |
| <b>RBC (10<sup>6</sup>/mm<sup>3</sup>)</b> | 10.6±0.6         | 11.2±0.7        | 11.1±0.4         | 11.2±0.4        | 10.7±0.5         | 10.7±0.4        | 10.2±0.2         | 10.3±0.8        |
| <b>HGB (g/dL)</b>                          | 18.4±0.4         | 18.5±0.7        | 17.8±0.4         | 17.9±0.7        | 17.5±0.6         | 17.5±0.5        | 17.6±0.1         | 17.6±0.5        |
| <b>HCT (%)</b>                             | 58.6±2.5         | 61±2.6          | 55.8±3.4         | 55.8±1.9        | 52.8±2.8         | 52.7±2.1        | 51.4±1.4         | 51.1±3.5        |
| <b>MCV (fl)</b>                            | 55.1±1.9         | 54.4±2          | 49.1±0.7         | 49.7±0.8        | 48.9±0.9         | 49.2±0.7        | 50.1±1.1         | 49.1±1.1        |
| <b>MCH (pg)</b>                            | 17.3±1           | 16.5±1.3        | 15.9±0.4         | 15.9±0.5        | 16.3±0.6         | 16.3±0.5        | 17.1±0.4         | 17±0.8          |
| <b>MCHC (g/dL)</b>                         | 31.5±1.3         | 30.3±1.3        | 32.4±0.9         | 32.1±1.1        | 33.3±1.2         | 33.3±1          | 34.2±0.9         | 34.5±1.2        |
| <b>RDW (%)</b>                             | 15.7±1.7         | 14.5±1.4        | 13.8±0.5         | 13.9±0.5        | 13.8±0.4         | 13.9±0.3        | 14.1±0.3         | 14.3±0.2        |
| <b>PLT (10<sup>3</sup>/mm<sup>3</sup>)</b> | 955.5±562        | 581.1±531.7     | 822±395.7        | 561.2±303.6     | 776.6±502.6      | 707.6±252.3     | 871.5±523.4      | 961.4±521.5     |
| <b>MPV (fl)</b>                            | 6.7±0.4          | 6.3±0.5         | 6±0.6            | 5.8±0.3         | 6.1±0.4          | 6.1±0.2         | 6.2±0.2          | 6.1±0.2         |
| <b>LYM (%)</b>                             | 82.2±4.3         | 82.9±5.1        | 74±3.7           | 74.1±6.9        | 71.8±6.9         | 71.6±6.1        | 72.5±5.6         | 71.3±4.3        |
| <b>MON (%)</b>                             | 2.9±0.4          | 2.9±0.4         | 4±0.3            | 3.9±0.4         | 3.9±0.5          | 4±0.3           | 4±0.5            | 4±0.3           |
| <b>GRA (%)</b>                             | 14.8±3.9         | 14.1±4.8        | 21.9±3.4         | 21.8±6.5        | 24.2±6.4         | 24.3±5.8        | 23.4±5.2         | 24.6±4.1        |

Values presented as mean±SD

WBC= white blood cell count; RBC= red blood cell count; HGB= hemoglobin; HCT= hematocrit; MCV= mean corpuscular volume; MCH= mean cell hemoglobin content; MCHC= mean corpuscular hemoglobin concentration; RDW= red blood cell distribution width; PLT= platelet count; MPV= mean platelet volume; LYM= lymphocyte count; MON= monocyte count; GRA= granulocyte count; WT= wildtype; DMSO= exposure to 0.1% DMSO (vehicle) via drinking water; PCB= exposure to 1 µM PCB-153 via drinking water.

**Table S5: SXRKO blood parameters over time in chronic exposure study**

|                                            | Week 6              |                    | Week 22             |                    | Week 30             |                    | Week 40             |                    |
|--------------------------------------------|---------------------|--------------------|---------------------|--------------------|---------------------|--------------------|---------------------|--------------------|
|                                            | SXRKO DMSO<br>n= 18 | SXRKO PCB<br>n= 22 | SXRKO DMSO<br>n= 18 | SXRKO PCB<br>n= 22 | SXRKO DMSO<br>n= 18 | SXRKO PCB<br>n=22  | SXRKO DMSO<br>n= 18 | SXRKO PCB<br>n=22  |
| <b>WBC(10<sup>3</sup>/mm<sup>3</sup>)</b>  | 14.7±5              | 16.3±4             | 21.3±3.9            | 19.8±6.5           | 25.3±5.8            | 21.9±4.1           | 22±5.8              | 19.1±7.4           |
| <b>RBC (10<sup>6</sup>/mm<sup>3</sup>)</b> | 11.8±1              | 11.1±0.8           | 11.2±0.4            | 11±0.4             | 11.1±0.5            | 10.9±0.5           | 10.5±0.5            | 10.6±0.8           |
| <b>HGB (g/dL)</b>                          | 18.7±1.1            | <b>**17.8±0.7</b>  | 18.3±0.5            | <b>***17.7±1</b>   | 18.3±0.5            | <b>***17.7±0.4</b> | 18±0.3              | <b>***17.6±0.7</b> |
| <b>HCT (%)</b>                             | 63.2±4.6            | <b>*58.8±4.3</b>   | 56.4±1.9            | 55.1±2.6           | 55.3±2.8            | 54.1±2.6           | 53.2±2.6            | 53.3±4.8           |
| <b>MCV (fl)</b>                            | 53.7±1.9            | 53±3               | 50±0.6              | 49.8±0.7           | 49.7±0.7            | 49.5±0.9           | 50.3±0.8            | 49.6±0.7           |
| <b>MCH (pg)</b>                            | 15.9±1.1            | 16.1±1.1           | 16.3±0.4            | 16±0.8             | 16.5±0.7            | 16.2±0.5           | 17±0.6              | 16.5±0.8           |
| <b>MCHC (g/dL)</b>                         | 29.5±1.1            | 30.3±1.5           | 32.5±1              | 32.2±1.9           | 33.2±1.5            | 32.8±1.1           | 33.9±1.3            | 33.1±1.9           |
| <b>RDW (%)</b>                             | 13.9±0.8            | <b>*15.2±1.6</b>   | 14.2±0.5            | 14.4±0.5           | 13.9±0.4            | 13.1±3.3           | 14±0.5              | 14.1±0.5           |
| <b>PLT (10<sup>3</sup>/mm<sup>3</sup>)</b> | 335.3±384.7         | 432±343.2          | 602.4±290.9         | 684.5±299          | 646.6±377.5         | 751.1±366.9        | 1051±581            | 980.6±531.7        |
| <b>MPV (fl)</b>                            | 6.4±0.3             | 6.7±0.6            | 5.6±0.1             | 5.6±0.2            | 6.1±0.2             | 6±0.2              | 5.9±0.3             | 5.8±0.2            |
| <b>LYM (%)</b>                             | 80.8±6.5            | 77.5±7.7           | 78.6±1.5            | 76.1±5.4           | 71.3±4.9            | 73.9±4.9           | 72.5±5.5            | 71.2±6             |
| <b>MON (%)</b>                             | 3.4±0.8             | 3.5±0.7            | 3.9±0.1             | 3.9±0.4            | 4.1±0.4             | 4.9±4              | 4±0.4               | 4.1±0.4            |
| <b>GRA (%)</b>                             | 15.6±6              | 18.9±7.1           | 17.4±1.5            | 19.9±5.1           | 24.5±4.6            | 22.1±4.6           | 23.3±5.2            | 24.6±5.7           |

Values presented as mean±SD

asterisks indicate significance compared to vehicle treated group at the same timepoint, determined by Student’s t-test. \*p<0.05, \*\*p<0.01, \*\*\*p<0.001 WBC= white blood cell count; RBC= red blood cell count; HGB= hemoglobin; HCT= hematocrit; MCV= mean corpuscular volume; MCH= mean cell hemoglobin content; MCHC= mean corpuscular hemoglobin concentration; RDW= red blood cell distribution width; PLT= platelet count; MPV= mean platelet volume; LYM= lymphocyte count; MON= monocyte count; GRA= granulocyte count; SXRKO= SXR knockout; DMSO= exposure to 0.1% DMSO (vehicle) via drinking water; PCB= exposure to 1 µM PCB-153 via drinking water..

Excel Table S1: Significant Liver DEGs in Supplemental Excel File

Excel Table S2: Significant Spleen DEGs in Supplemental Excel File

Excel Table S3: Liver GO terms in Supplemental Excel File

Excel Table S4: Spleen GO terms in Supplemental Excel File



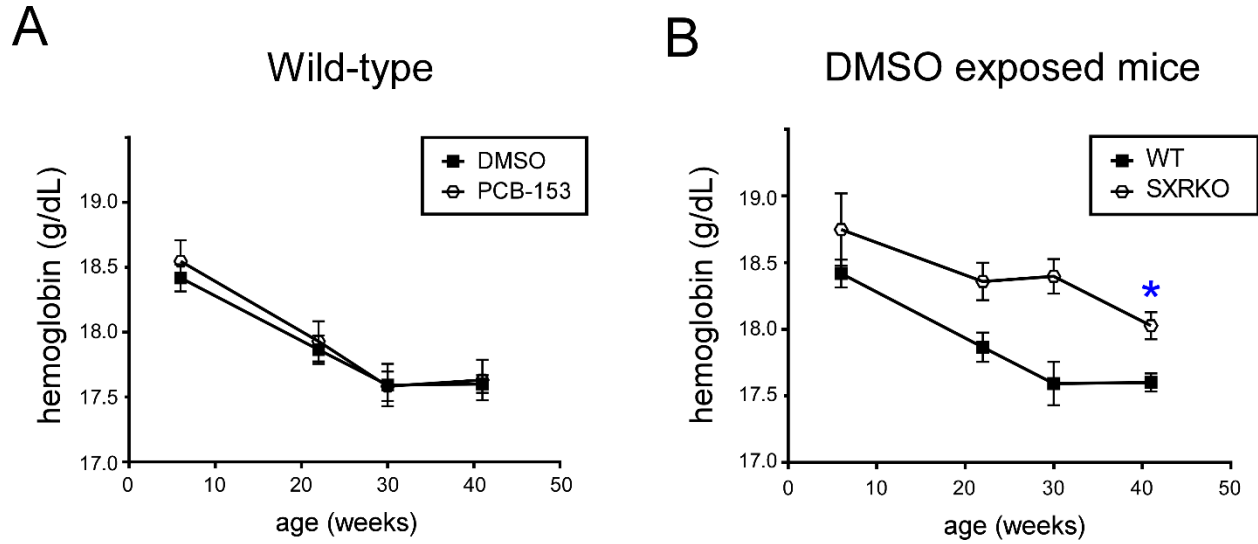

**Figure S1: Blood hemoglobin levels throughout lifespan.** Blood hemoglobin levels of wild-type (WT) mice from 6 to 40 weeks of age exposed to either PCB-153 (n= 23) or vehicle/DMSO (n= 14) as measured by the blood analyzer and plotted as mean  $\pm$  SEM (A). Blood hemoglobin values of vehicle/DMSO exposed WT (n= 14) and SXRKO (n= 18) mice from 6 to 40 weeks of age (B). Data plotted as mean  $\pm$  SEM. \* = p-value < 0.05 determined by Student's t-test comparing to WT mice at the same timepoint in panel B.

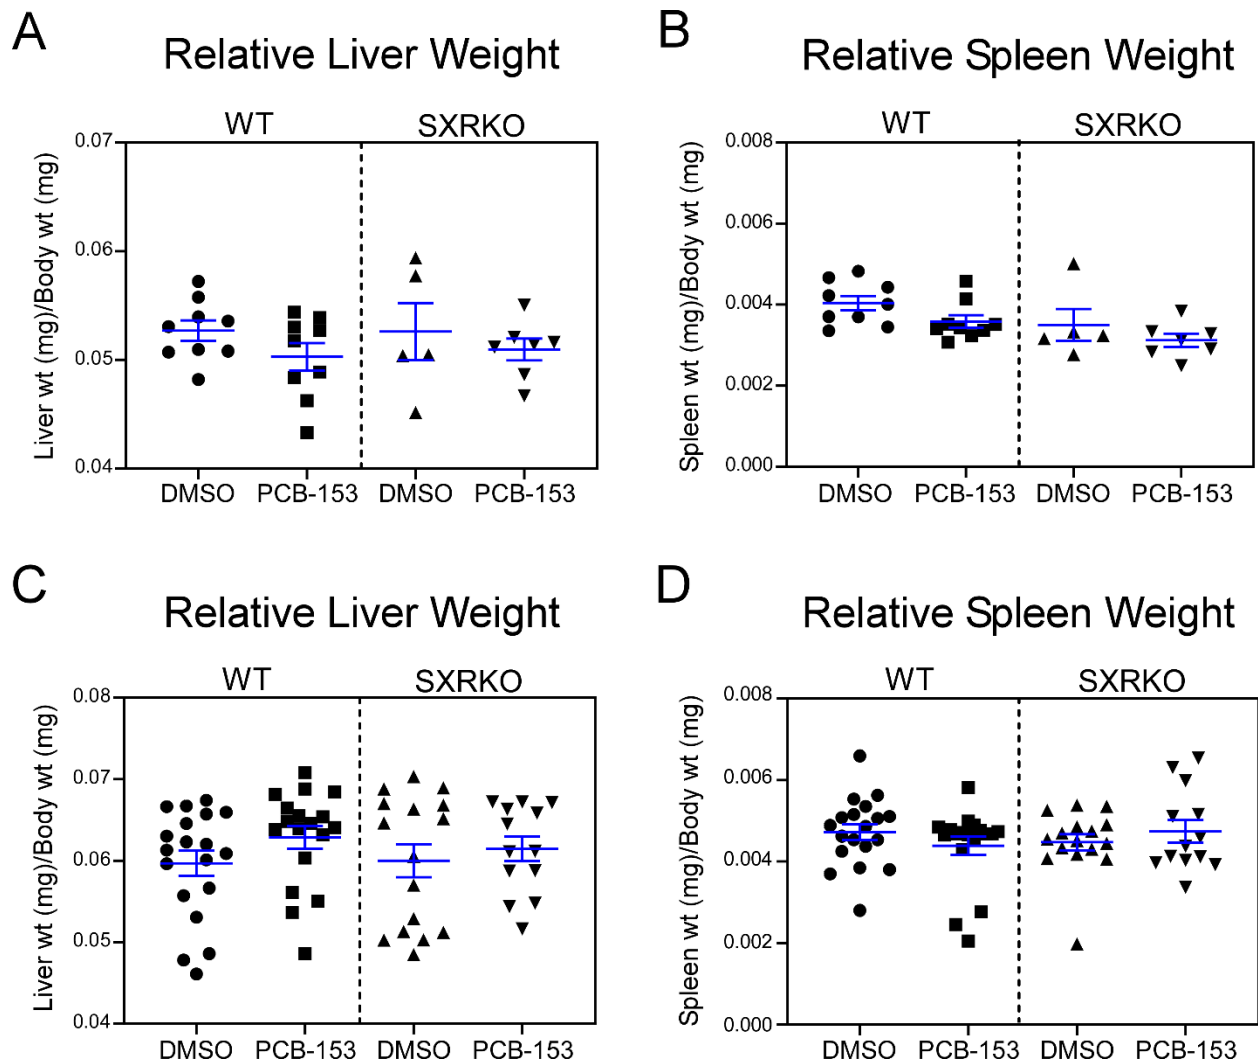

**Figure S2: Relative liver and spleen weights of dams and pups from perinatal PCB-153 exposure study.** Relative liver weights (A) and spleen weights (B) for DMSO and PCB-153 exposed WT and SXRKO dams (WT DMSO: n=9; WT PCB-153: n=9; SXRKO DMSO: n=5; SXRKO PCB-153: n=7). Relative liver weights (C) and spleen weights (D) for perinatally exposed WT and SXRKO mice at 4 weeks of age (WT DMSO: n= 19; WT PCB-153: n=18; SXRKO DMSO: n=16; SXRKO PCB-153: n=13). Plotted as mean  $\pm$  SEM.

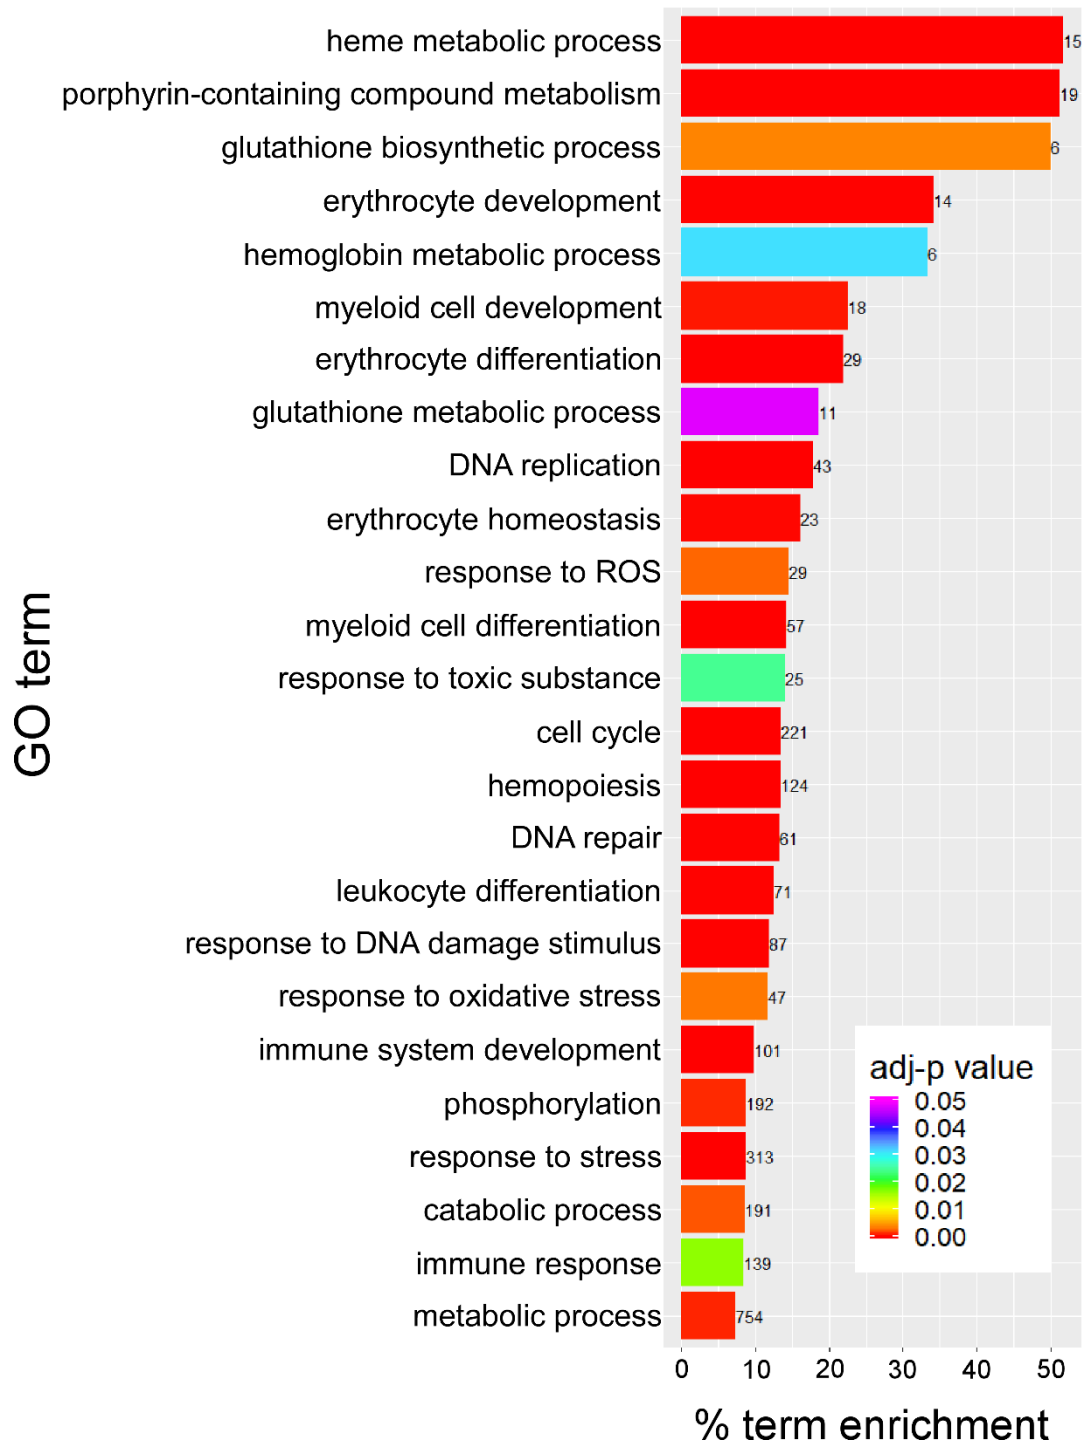

**Figure S3: Gene Ontology (GO) term enrichment of spleen RNA-seq data set comparing SXRKO mice exposed to PCB-153 vs SXRKO mice exposed to vehicle (DMSO) in perinatal exposure study.** GO term enrichment of select biological processes (BP) of SXRKO PCB vs SXRKO DMSO in the spleen RNA-seq dataset. Number of significant genes within each term is displayed to the right of the bar.

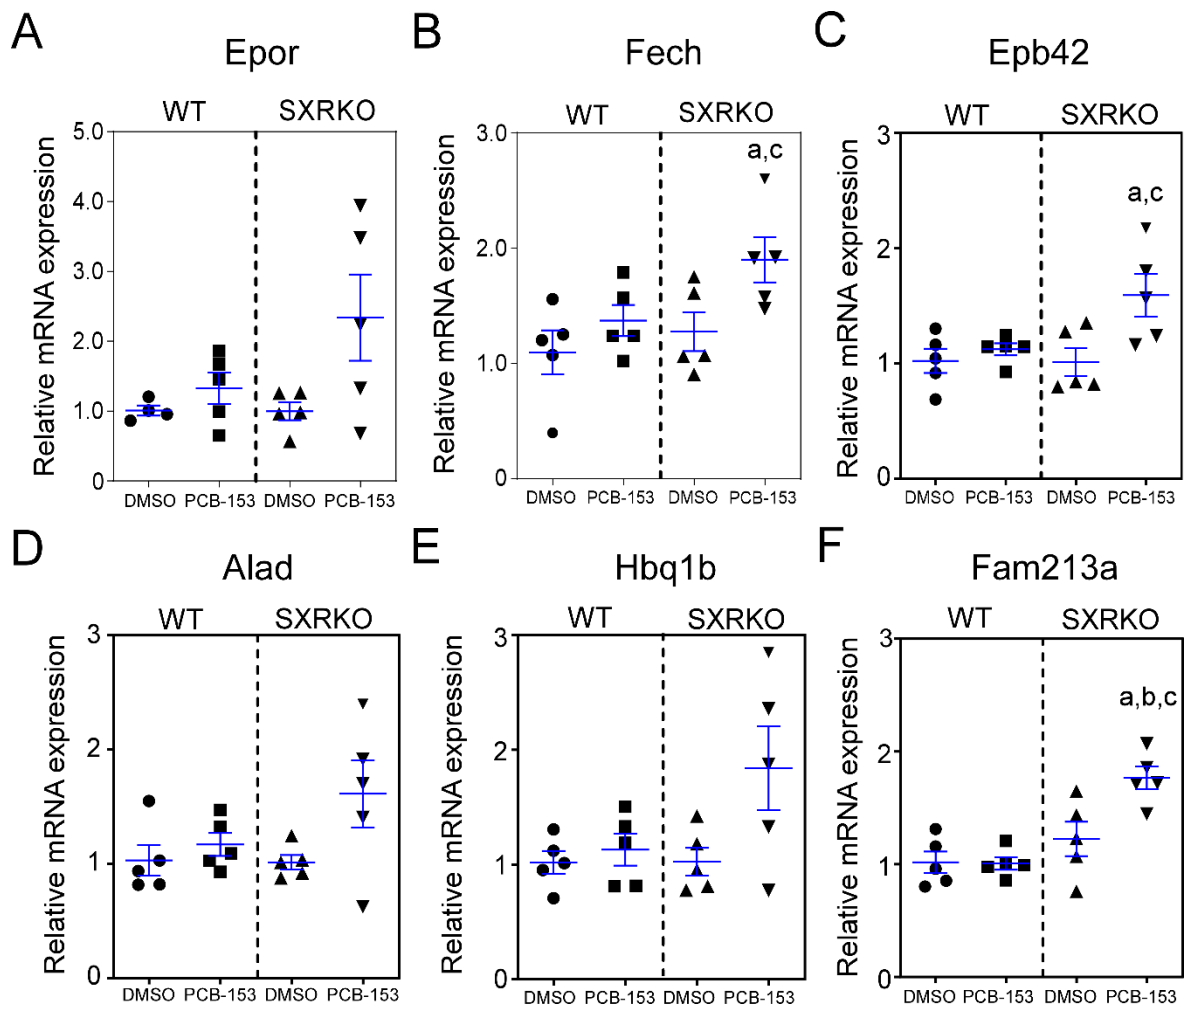

**Figure S4: qPCR validation of select differentially expressed genes (DEGs) related to erythrocyte development and heme metabolism in the spleen.** Relative mRNA expression of Erythropoietin receptor (Epor) (A), Ferrochelatase (Fech) (B), Erythrocyte membrane protein band 4.2 (Epb42) (C),  $\delta$ -aminolevulinic acid dehydratase (Alad) (D), hemoglobin subunit theta 1B (Hbq1b) (E), and Redox-regulatory protein Fam213a (F) in the spleen (n= 5 per group) determined by qPCR analysis compared to  $\beta$ -actin/Actb housekeeping gene. Plotted as mean  $\pm$  SEM. a= statistically significant compared to WT DMSO, b= statistically significant compared to WT PCB, c= statistically significant compared to SXRKO DMSO determined by two-way ANOVA and Tukey's multiple comparisons test.

A

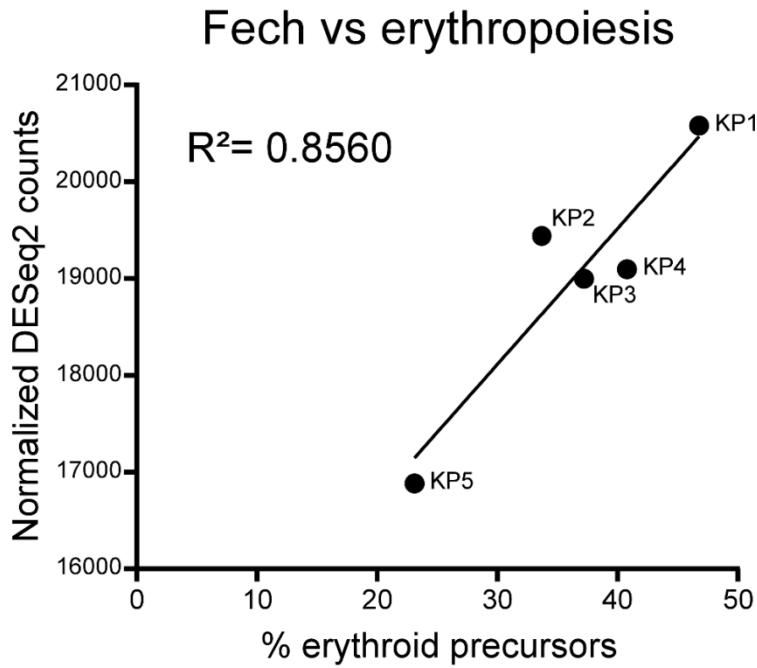

B

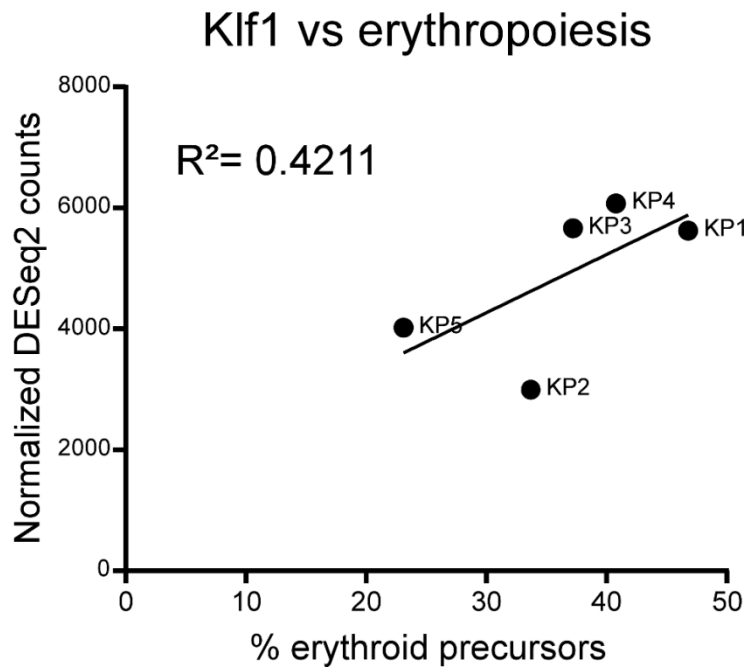

**Figure S5:** Correlation plots of mRNA expression of erythrocyte development and heme metabolism genes with level of erythropoiesis in the spleen of SXRKO mice exposed to PCB-153. Plots of the percentage of splenic erythroid precursors vs normalized DESeq2 counts in the spleen dataset for Fech (A) and Klf1 (B). KP= SXRKO mice exposed to PCB-153. KP#= sample ID#

### Ex vivo hemolysis assay

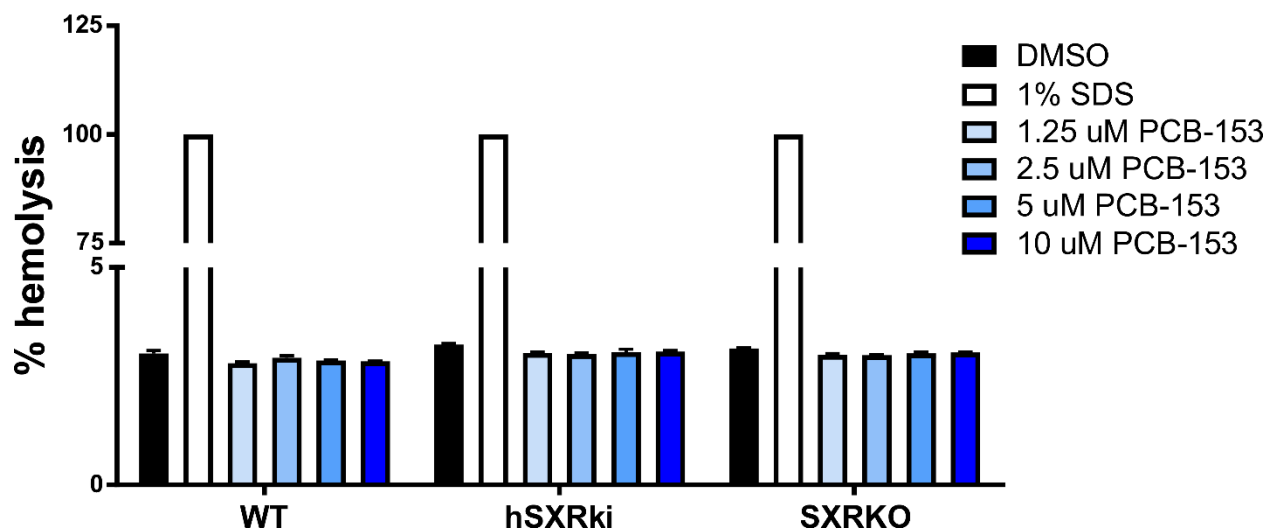

**Figure S6: PCB-153 ex vivo hemolysis assay.** *Ex vivo* hemolysis assay of red blood cells (RBCs) from WT (n=3), hSXRki (n=3), and SXRKO (n=3) mice treated *ex vivo* to vehicle (DMSO), positive control (1% SDS), and four different concentrations of PCB-153. Results plotted as mean fold over positive control  $\pm$  SEM.

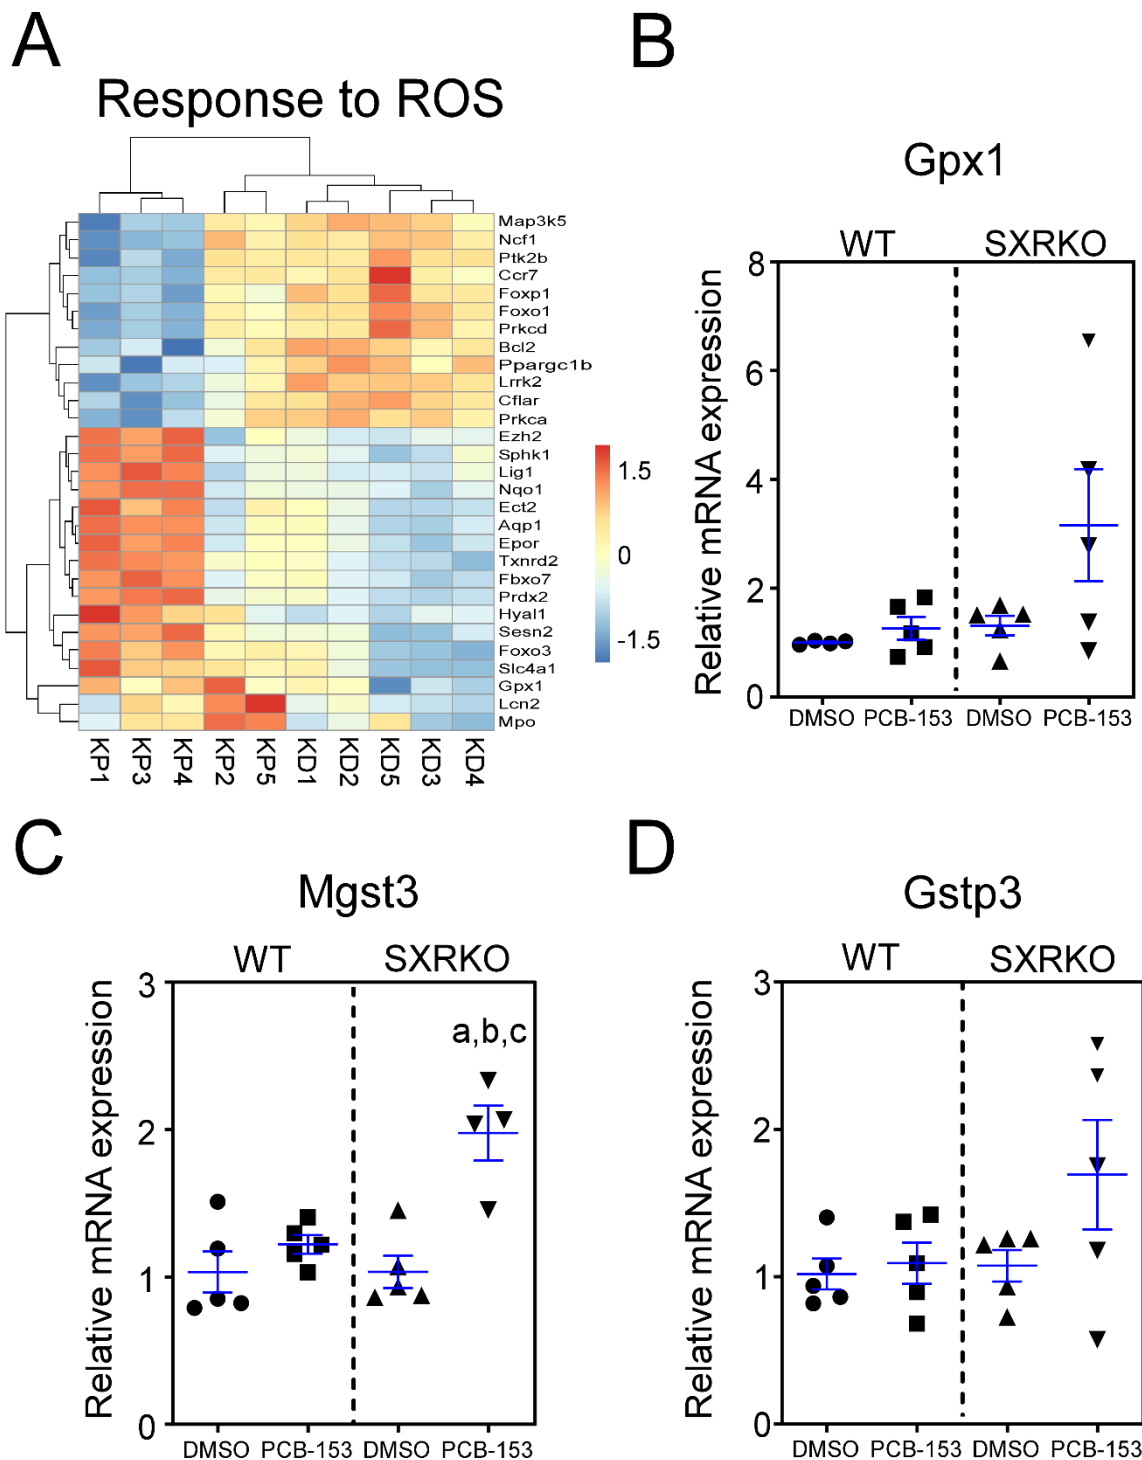

**Figure S7: qPCR validation of differentially expressed genes (DEGs) related to oxidative stress in the spleen of SXRKO mice exposed to PCB-153 vs vehicle (DMSO).** Heatmap of DEGs in the GO term of Response to reactive oxygen species (ROS) (A). qPCR validation of the antioxidant gene Gpx1 (B) and glutathione S-transferase genes, Mgst3 (C) and Gstp3 in the spleen (n= 5 per group) compared to Actb housekeeping gene, plotted as mean  $\pm$  SEM. a= statistically significant compared to WT DMSO, b= statistically significant compared to WT PCB, c= statistically significant compared to SXRKO DMSO determined by two-way ANOVA and Tukey's multiple comparisons test.

**A**

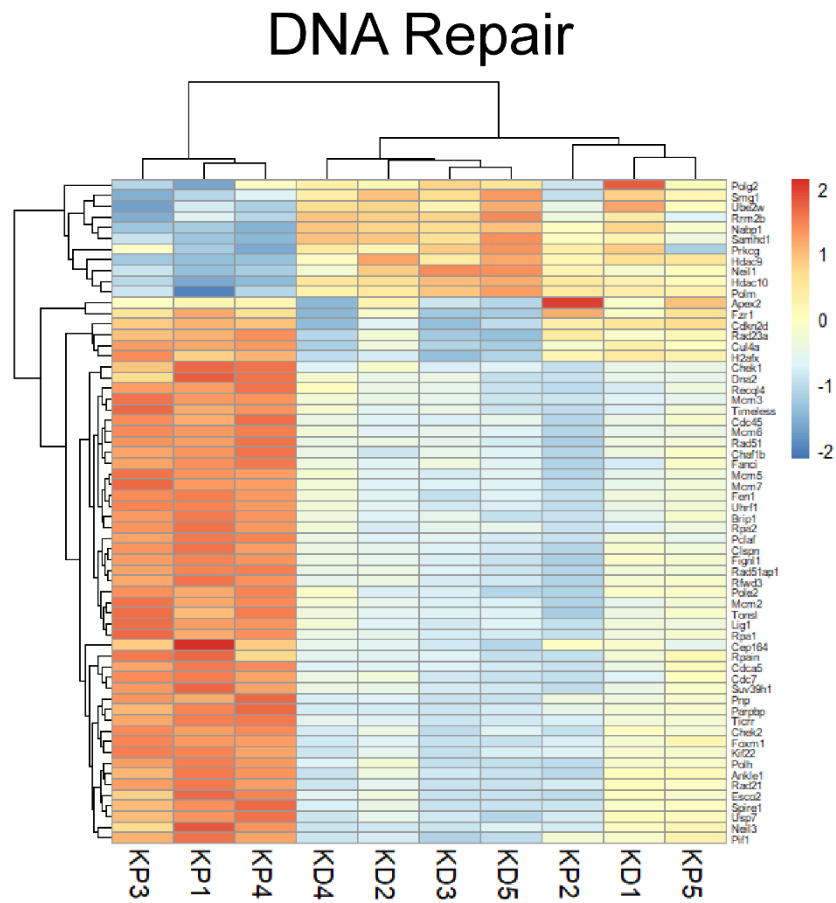

**B**

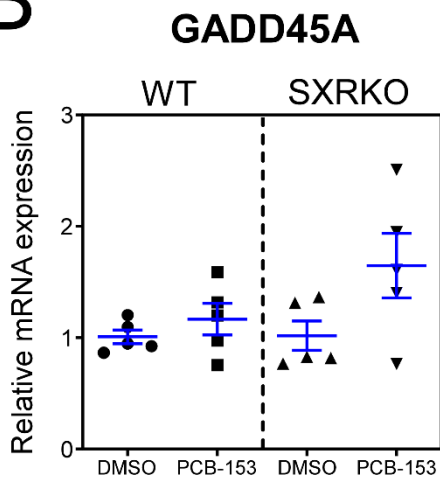

**C**

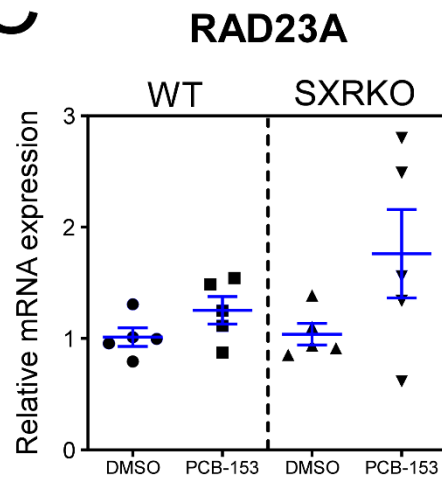

**Figure S8: DNA repair genes in the spleen of WT and SXRKO mice exposed to vehicle or PCB-153.** Heatmap of significant differentially expressed genes within the GO term of DNA repair between spleens of SXRKO mice exposed to PCB-153 vs DMSO (A). qPCR validation of Growth Arrest and DNA Damage Inducible Alpha (Gadd45a) (B) and RAD23 Homolog A (Rad23a) (C) in the spleen (n= 5 per group) compared to Actb housekeeping gene, plotted as mean ± SEM.



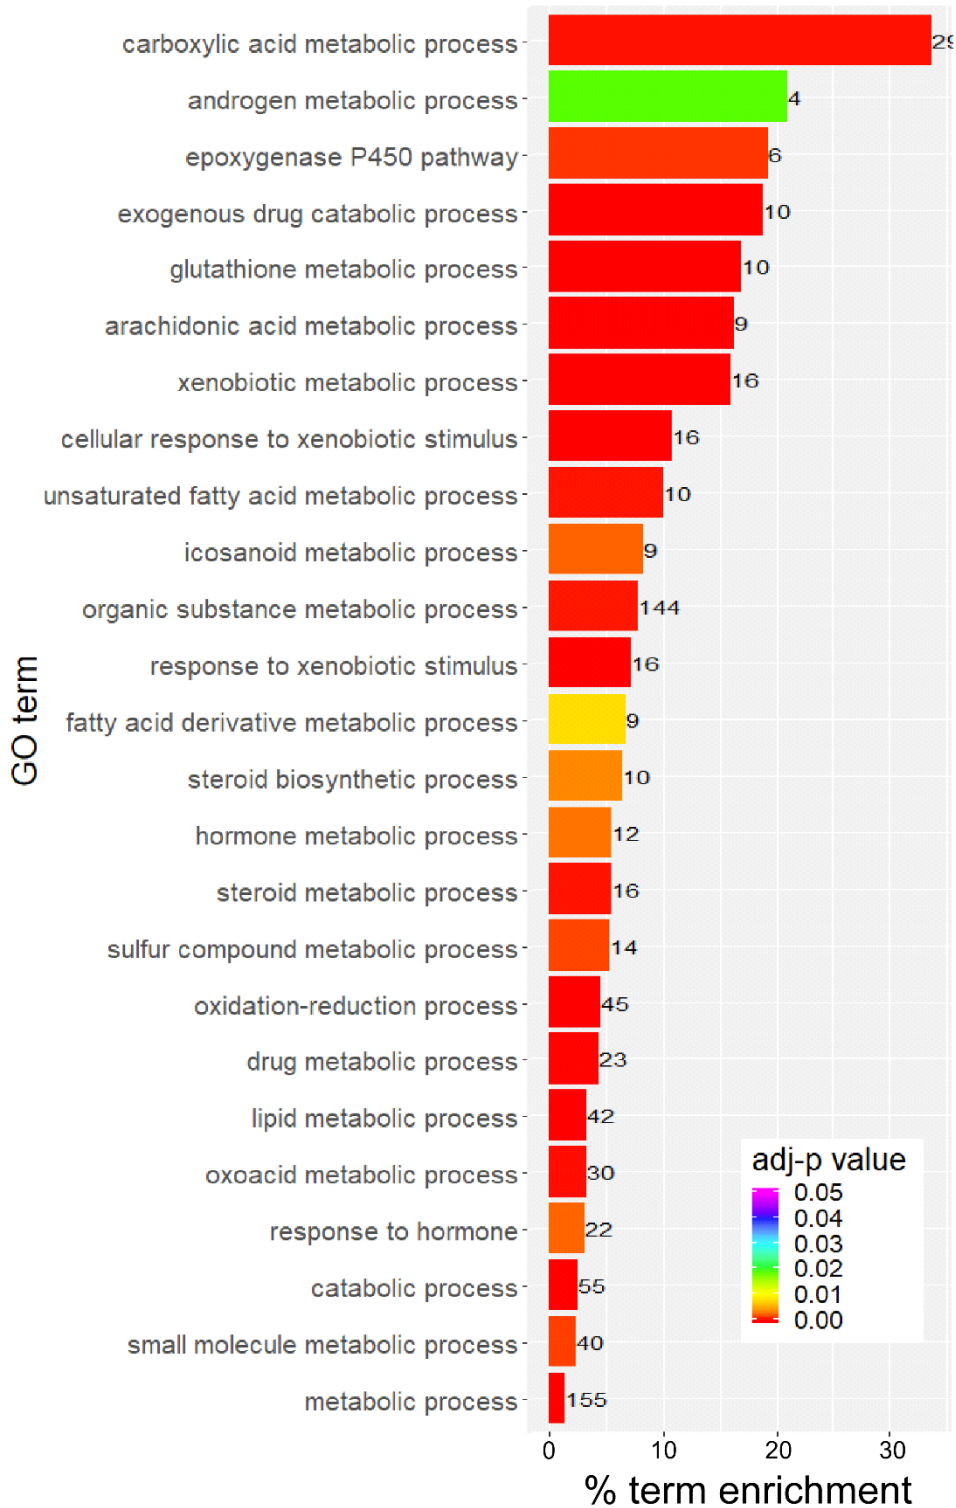

**Figure S9: Gene Ontology (GO) term enrichment of liver RNA-seq dataset comparing SXRKO vs wild-type mice exposed to vehicle (DMSO).** GO term enrichment of select biological processes (BP) of SXRKO DMSO vs WT DMSO in the liver RNA-seq dataset. Number of significant genes within each term is displayed to the right of the bar.

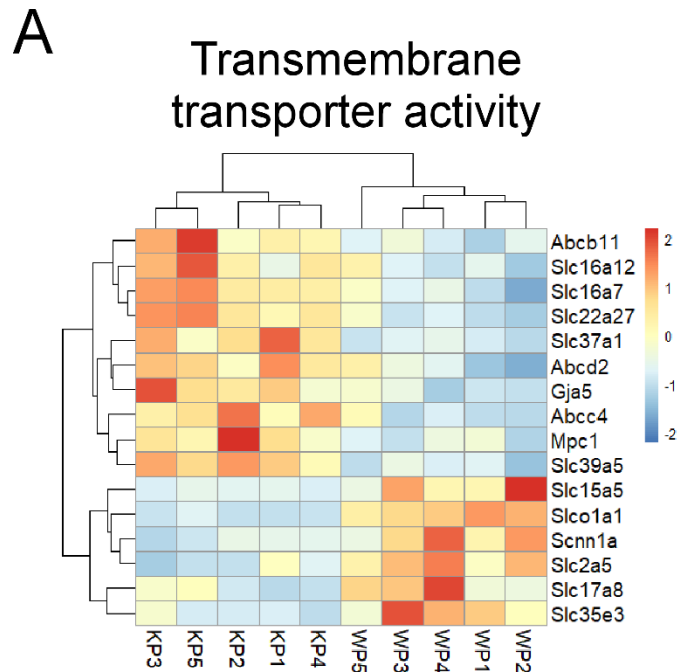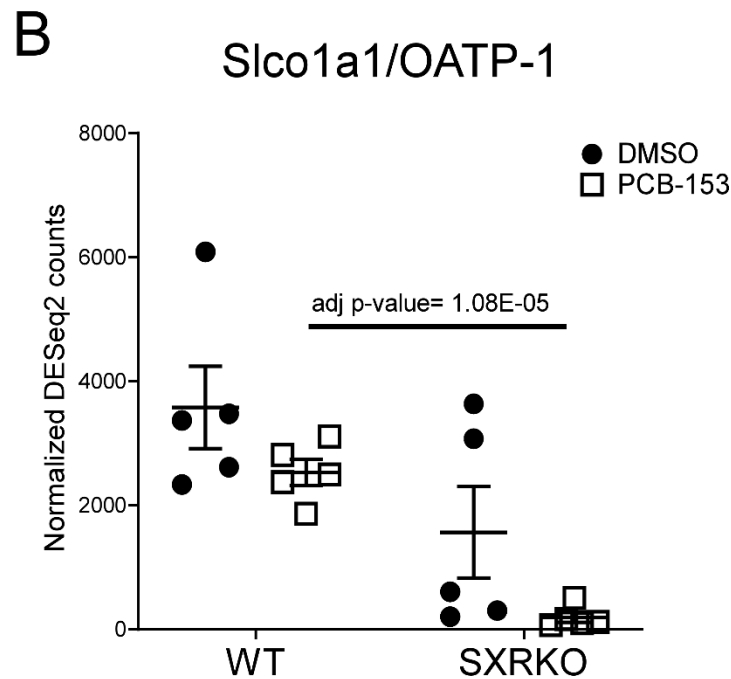

**Figure S10:** Differential expression of genes related to transmembrane transporter activity between WT and SXRKO mice with DMSO and PCB-153 exposure. Heatmap of DEGs related to transmembrane transporter activity in the livers between SXRKO and WT mice exposed to PCB-153 (A). Normalized counts of solute carrier organic anion transporter family member 1A1 (Slco1a1/OATP-1) obtained from DESeq2 (B). Lines demonstrate the comparisons that were significant as determined by DESeq2 using the criteria listed in the Methods. Adjusted p-values determined by DESeq2 analysis are displayed above lines for corresponding comparisons.

### A Glucuronosyltransferase Activity

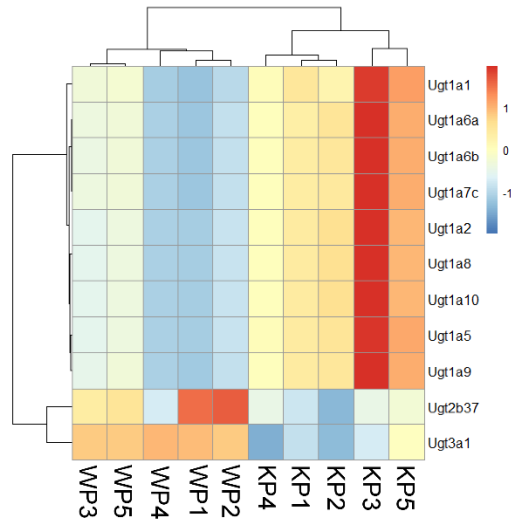

### B Ugt3a1

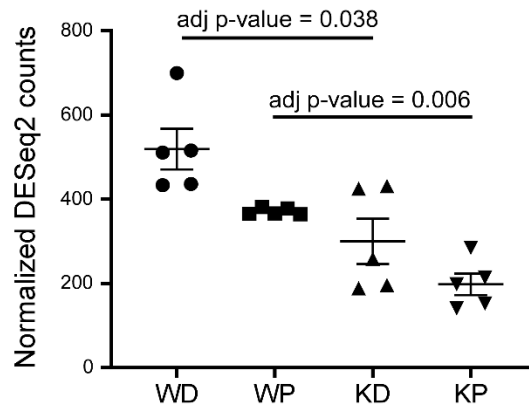

### C Sulfotransferase Activity

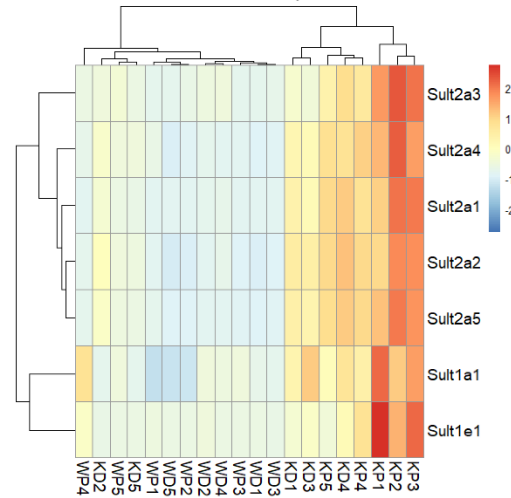

### D Sult2a1

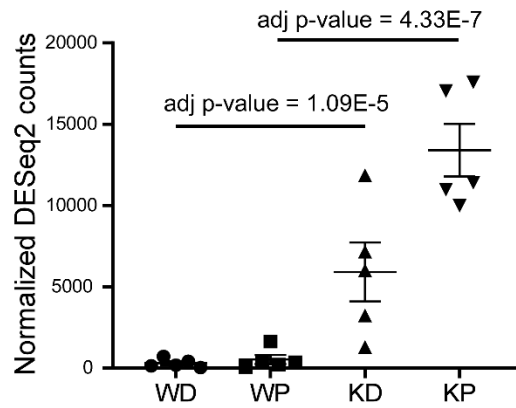

**Figure S11: Differential expression of various UGT and SULT genes between livers of WT and SXRKO mice with DMSO and PCB-153 exposure.** Heatmap of DEGs related to glucuronosyltransferase activity in the livers between SXRKO and WT mice exposed to PCB-153 (A). Normalized counts of Ugt3a1 obtained from DESeq2 (B). Heatmap of DEGs related to sulfotransferase activity, comparing all groups (C). Normalized counts of Sult2a1 obtained from DESeq2 analysis (D). Lines demonstrate the comparisons that were significant as determined by DESeq2 using the criteria listed in the Methods. Adjusted p-values determined by DESeq2 analysis are displayed above lines for corresponding comparisons.

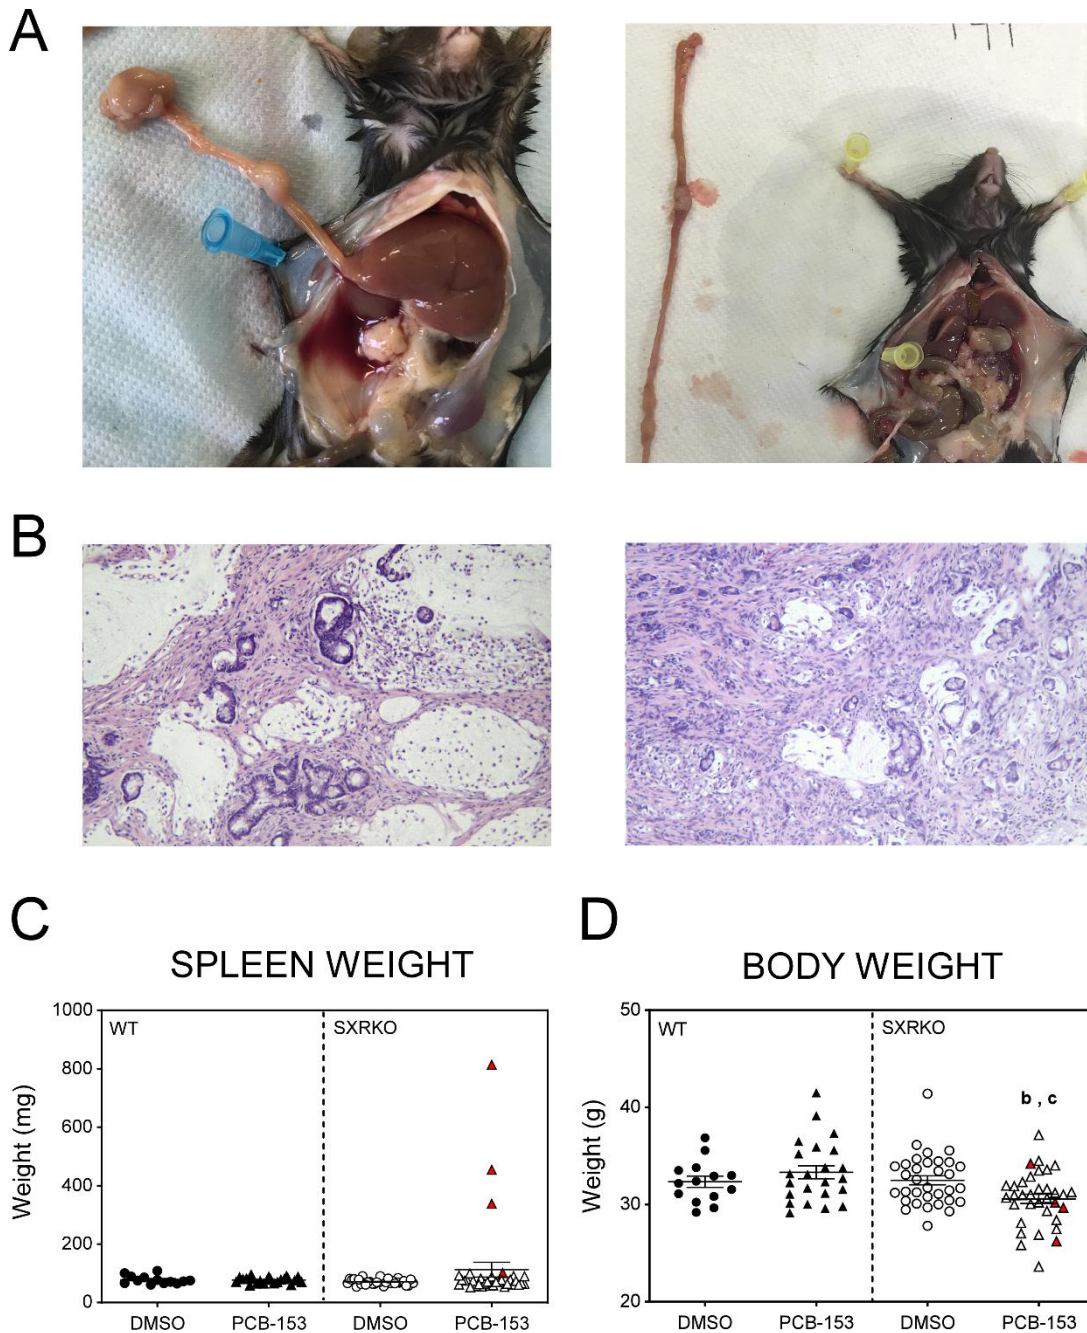

**Figure S12: Tumor images, body weights, and spleen weights of mice chronically exposed to PCB-153.** Representative images of SXRKO mice chronically exposed to PCB-153 displaying tumors in the upper small intestine near the duodenum-jejunum junction (A). Representative histology images of the intestinal tumors at 40X total magnification (B). Spleen weights (C) and body weights (D) of chronically exposed mice (WT DMSO: n=14; WT PCB-153: n=23; SXRKO DMSO: n=33; SXRKO PCB-153: n=35). Tumor bearing mice are indicated with red shaded symbols in panel C and D. Data plotted as mean  $\pm$  SEM. b= statistically significant compared to WT PCB, c= statistically significant compared to SXRKO DMSO determined by two-way ANOVA and Tukey's multiple comparisons test.

## RNA-seq script

```
#####  
#STAR HPC Cluster Script#  
#####  
  
#generate genome index on HPC cluster  
module purge  
module load gcc/6.4.0 STAR/2.6.0c  
STAR --runThreadN 12 \  
--runMode genomeGenerate \  
--genomeDir /bio/regusqui/PCB_RNAseq/mm10/STARindexENSEMBLencode \  
--genomeFastaFiles  
/bio/regusqui/PCB_RNAseq/mm10/ENSEMBLfasta/Mus_musculus.GRCm38.dna.pri  
mary_assembly.fa \  
--sjdbGTFfile  
/bio/regusqui/PCB_RNAseq/mm10/ENCODEmouseAnnotation/gencode.vM20.annot  
ation.gtf \  
--sjdbOverhang 99  
  
#Align fastq files to mouse genome (repeated for each file)  
STAR --runThreadN 16 \  
--genomeDir /dfs3/bio/regusqui/PCB_RNAseq/mm10/STARindexENSEMBL \  
--readFilesIn  
/dfs3/bio/regusqui/PCB_RNAseq/liver/fastq_files/reSequencedFiles/KP2-  
GCCAAT-Sequences.txt.gz \  
--readFilesCommand zcat \  
--outFileNamePrefix  
/dfs3/bio/regusqui/PCB_RNAseq/liver/newBAMfiles/WD1_ \  
--outSAMtype BAM Unsorted SortedByCoordinate  
  
#####  
# Rsubread R Script #  
#####  
  
#install Rsubread  
if (!requireNamespace("BiocManager", quietly = TRUE))  
+ install.packages(BiocManager)  
BiocManager::install("Rsubread", version = "3.8")  
library("Rsubread")  
  
#set input and output directories  
dir_input <- "/dfs3/bio/regusqui/PCB_RNAseq/liver/newBAMfiles/"  
dir_output <- "/dfs3/bio/regusqui/PCB_RNAseq/liver/Rsubread/"  
setwd(dir_output)
```

```

#specify GTF file
gtf.file <-
"/dfs3/bio/regusqui/PCB_RNAseq/mm10/ENSEMBLannotation/Mus_musculus.GRC
m38.95.gtf"

#load STAR BAM files
WD1 <- paste0(dir_input, "WD1_Aligned.out.bam")
WD2 <- paste0(dir_input, "WD2_Aligned.out.bam")
WD3 <- paste0(dir_input, "WD3_Aligned.out.bam")
WD4 <- paste0(dir_input, "WD4_Aligned.out.bam")
WD5 <- paste0(dir_input, "WD5_Aligned.out.bam")
WP1 <- paste0(dir_input, "WP1_Aligned.out.bam")
WP2 <- paste0(dir_input, "WP2_Aligned.out.bam")
WP3 <- paste0(dir_input, "WP3_Aligned.out.bam")
WP4 <- paste0(dir_input, "WP4_Aligned.out.bam")
WP5 <- paste0(dir_input, "WP5_Aligned.out.bam")
KD1 <- paste0(dir_input, "KD1_Aligned.out.bam")
KD2 <- paste0(dir_input, "KD2_Aligned.out.bam")
KD3 <- paste0(dir_input, "KD3_Aligned.out.bam")
KD4 <- paste0(dir_input, "KD4_Aligned.out.bam")
KD5 <- paste0(dir_input, "KD5_Aligned.out.bam")
KP1 <- paste0(dir_input, "KP1_Aligned.out.bam")
KP2 <- paste0(dir_input, "KP2_Aligned.out.bam")
KP3 <- paste0(dir_input, "KP3_Aligned.out.bam")
KP4 <- paste0(dir_input, "KP4_Aligned.out.bam")
KP5 <- paste0(dir_input, "KP5_Aligned.out.bam")
bam.files <-
c(WD1,WD2,WD3,WD4,WD5,WP1,WP2,WP3,WP4,WP5,KD1,KD2,KD3,KD4,KD5,KP1,KP2,
KP3,KP4,KP5)

#Run Rsubread to obtain exon counts
counts <- featureCounts(files = bam.files,
                        annot.ext = gtf.file,
                        isGTFAnnotationFile = TRUE,
                        GTF.featureType = "exon",
                        GTF.attrType = "gene_name",
                        allowMultiOverlap = TRUE,
                        isPairedEnd = FALSE,
                        nthreads = 24,
                        countMultiMappingReads = TRUE,
                        strandSpecific = 0)

# Get counts in data frame
liver_unsorted_counts.df <- as.data.frame(counts$counts)

# Simplify column names

```

```

colnames(liver_unsorted_counts.df) <-
sub("X.dfs3.bio.regusqui.PCB_RNAseq.liver.newBAMfiles.", "",
colnames(liver_unsorted_counts.df))
colnames(liver_unsorted_counts.df) <- sub("_Aligned.out.bam", "",
colnames(liver_unsorted_counts.df))

# Save data frame file
write.table(liver_unsorted_counts.df,
file=paste0(dir_output,"liver_unsorted_counts.txt"),quote=F,col.names=
T,row.names=T,sep="\t")

#####
# DESeq2 R Script #
#####

# Load DESeq2
BiocManager::install("DESeq2", version = "3.8")
library("DESeq2")

# Set new input output and working directory
dir_input <- "/dfs3/bio/regusqui/PCB_RNAseq/liver/Rsubread/"
dir_output <- "/dfs3/bio/regusqui/PCB_RNAseq/liver/DESeq2/"
setwd(dir_output)

# Load Rsubread count file
counts <- paste0(dir_input, "liver_unsorted_counts.txt")
countData <- read.table(counts, as.is=T, header=T, row.names=1)

# Define experimental design
samples <- c("WD1", "WD2", "WD3", "WD4", "WD5", "WP1", "WP2", "WP3",
"WP4", "WP5", "KD1", "KD2", "KD3", "KD4", "KD5", "KP1", "KP2", "KP3",
"KP4", "KP5")
condition <- c("WD", "WD", "WD", "WD", "WD", "WP", "WP", "WP", "WP",
"WP", "KD", "KD", "KD", "KD", "KD", "KP", "KP", "KP", "KP", "KP")
type <- "single-read"
liver_colData <- data.frame(condition=condition, type=type,
row.names=samples)

#DEG analysis
liver_dds_unsorted <- DESeqDataSetFromMatrix(countData = countData,
colData = liver_colData, design = ~ condition)
liver_dds_unsorted <- DESeq(liver_dds_unsorted)
liver_DESeq2results_KDvsWD_alpha0.05 <- results(liver_dds_unsorted,
alpha=0.05, contrast = c("condition", "KD", "WD"))

```

```

liver_DESeq2results_KPvsKD_alpha0.05 <- results(liver_dds_unsorted,
alpha = 0.05, contrast = c("condition", "KP", "KD"))
liver_DESeq2results_KPvsWP_alpha0.05 <- results(liver_dds_unsorted,
alpha = 0.05, contrast = c("condition", "KP", "WP"))
liver_DESeq2results_WPvsWD_alpha0.05 <- results(liver_dds_unsorted,
alpha = 0.05, contrast = c("condition", "WP", "WD"))
write.table(liver_DESeq2results_KDvsWD_alpha0.05, file =
paste0(dir_output, "liver_KDvsWD_alpha0.05.txt"), quote = F, col.names
= T, sep = "\t")
write.table(liver_DESeq2results_KPvsKD_alpha0.05, file =
paste0(dir_output, "liver_KPvsKD_alpha0.05.txt"), quote = F, col.names
= T, sep = "\t")
write.table(liver_DESeq2results_KPvsWP_alpha0.05, file =
paste0(dir_output, "liver_KPvsWP_alpha0.05.txt"), quote = F, col.names
= T, sep = "\t")
write.table(liver_DESeq2results_WPvsWD_alpha0.05, file =
paste0(dir_output, "liver_WPvsWD_alpha0.05.txt"), quote = F, col.names
= T, sep = "\t")

#obtain normalized counts
liver_dds_unsorted <- estimateSizeFactors(liver_dds_unsorted)
norm_liver_counts <- counts(liver_dds_unsorted, normalized=TRUE)
write.csv(norm_liver_counts, file="norm_liver_counts.csv")

```



**RNA quality: Bioanalyzer (Agilent Bioanalyzer 2100) results for RNA used for RNA-seq**

Liver: pages S24-S34, document links on page S35

Spleen: pages S36-S46, document links on page S47 (ignore samples labeled as L### in these documents as these were samples that were not included in the analysis for this experiment)

Assay Class: EukaryoteTotal RNA Nano

Created: 3/5/2019 2:45:22 PM

Data Path: D:\...\_EukaryoteTotal RNA Nano\_DE11400731\_2019-03-05\_14-45-22.xad

Modified: 3/6/2019 12:05:38 PM

**Electrophoresis File Run Summary**

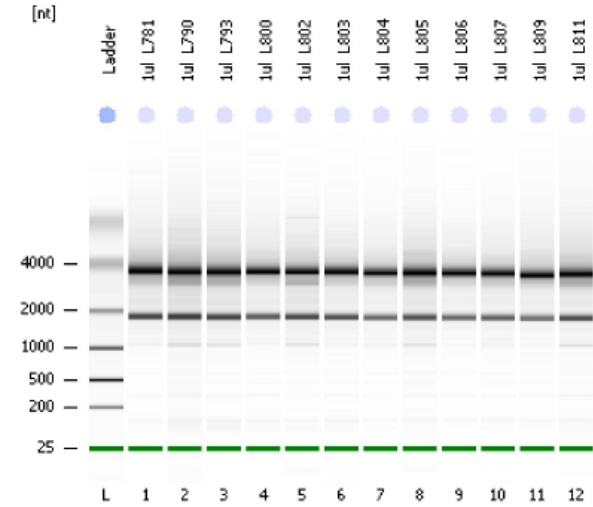

Instrument Information:

Instrument Name: DE11400731      Firmware: C.01.069  
 Serial#: DE11400731      Type: G2938A

Assay Information:

Assay Origin Path: C:\Program Files\Agilent\2100 bioanalyzer\2100 expert\assays\RNA\Eukaryote Total RNA Nano Series II.xsy  
 Title: Eukaryote Total RNA Nano Series II  
 Version: 2.5  
 Assay Comments: Copyright © 2003-2006 Agilent Technologies

Chip Information:

Chip Lot:  
 Reagent Kit Lot:  
 Chip Comments:

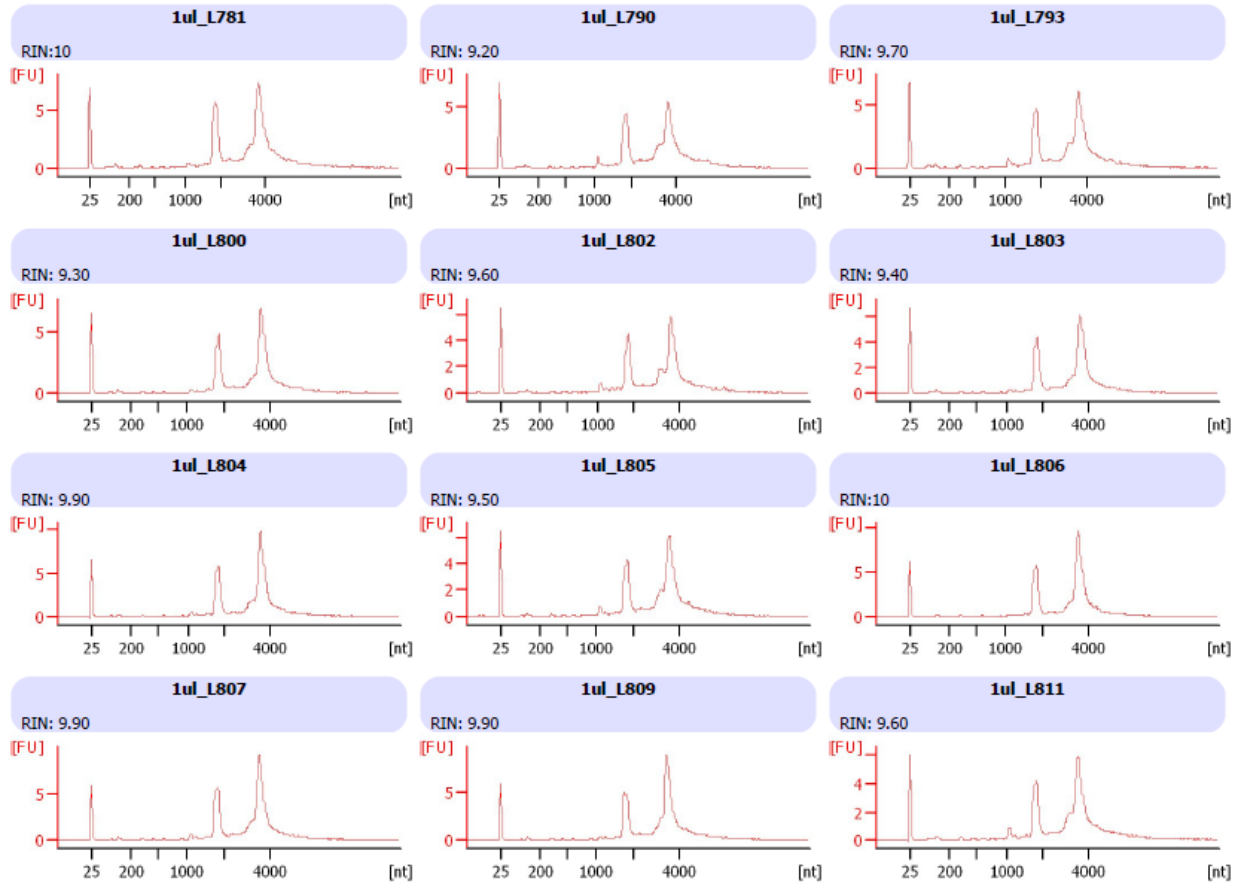

Assay Class: EukaryoteTotal RNA Nano  
 Data Path: D:\...\_EukaryoteTotal RNA Nano\_DE11400731\_2019-03-05\_14-45-22.xad

Created: 3/5/2019 2:45:22 PM  
 Modified: 3/6/2019 12:05:38 PM

**Electrophoresis File Run Summary (Chip Summary)**

| Sample Name       | Sample Comment | Status | Result Label | Result Color             |
|-------------------|----------------|--------|--------------|--------------------------|
| 1ul_L781          |                | ✓      | RIN:10       |                          |
| 1ul_L790          |                | ✓      | RIN: 9.20    |                          |
| 1ul_L793          |                | ✓      | RIN: 9.70    |                          |
| 1ul_L800          |                | ✓      | RIN: 9.30    |                          |
| 1ul_L802          |                | ✓      | RIN: 9.60    |                          |
| 1ul_L803          |                | ✓      | RIN: 9.40    |                          |
| 1ul_L804          |                | ✓      | RIN: 9.90    |                          |
| 1ul_L805          |                | ✓      | RIN: 9.50    |                          |
| 1ul_L806          |                | ✓      | RIN:10       |                          |
| 1ul_L807          |                | ✓      | RIN: 9.90    |                          |
| 1ul_L809          |                | ✓      | RIN: 9.90    |                          |
| 1ul_L811          |                | ✓      | RIN: 9.60    |                          |
| <b>Chip Lot #</b> |                |        |              | <b>Reagent Kit Lot #</b> |

**Chip Comments :**

Assay Class: EukaryoteTotal RNA Nano  
 Data Path: D:\...\_EukaryoteTotal RNA Nano\_DE11400731\_2019-03-05\_14-45-22.xad

Created: 3/5/2019 2:45:22 PM  
 Modified: 3/6/2019 12:05:38 PM

**Electropherogram Summary**

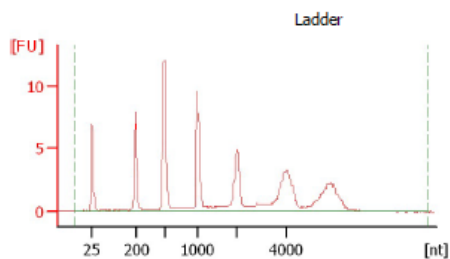

**Overall Results for Ladder**

RNA Area: 91.4  
 RNA Concentration: 150 ng/ul  
 Result Flagging Color:    
 Result Flagging Label: All Other Samples

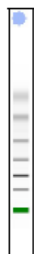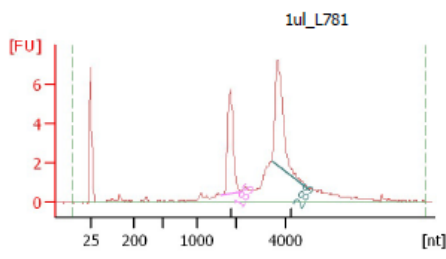

**Overall Results for sample 1 : 1ul\_L781**

RNA Area: 62.2  
 RNA Concentration: 102 ng/ul  
 rRNA Ratio [28s / 18s]: 1.3  
 RNA Integrity Number (RIN): 10 (B.02.06)  
 Result Flagging Color:    
 Result Flagging Label: RIN:10

**Fragment table for sample 1 : 1ul\_L781**

| Name | Start Size [nt] | End Size [nt] | Area | % of total Area |
|------|-----------------|---------------|------|-----------------|
| 18S  | 1,624           | 2,188         | 11.1 | 17.8            |
| 28S  | 3,410           | 4,938         | 14.4 | 23.1            |

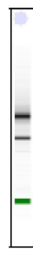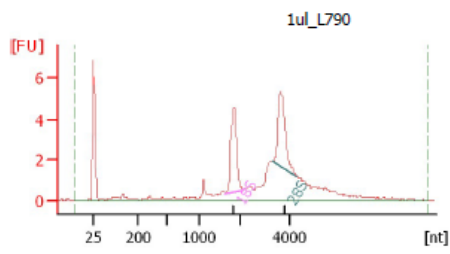

**Overall Results for sample 2 : 1ul\_L790**

RNA Area: 56.2  
 RNA Concentration: 92 ng/ul  
 rRNA Ratio [28s / 18s]: 1.0  
 RNA Integrity Number (RIN): 9.2 (B.02.06)  
 Result Flagging Color:    
 Result Flagging Label: RIN: 9.20

**Fragment table for sample 2 : 1ul\_L790**

| Name | Start Size [nt] | End Size [nt] | Area | % of total Area |
|------|-----------------|---------------|------|-----------------|
| 18S  | 1,636           | 2,147         | 8.9  | 15.9            |
| 28S  | 3,313           | 4,267         | 8.8  | 15.7            |

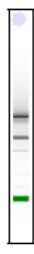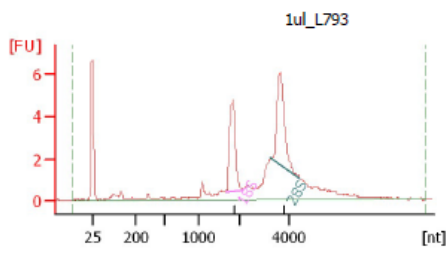

**Overall Results for sample 3 : 1ul\_L793**

RNA Area: 57.0  
 RNA Concentration: 94 ng/ul  
 rRNA Ratio [28s / 18s]: 1.1  
 RNA Integrity Number (RIN): 9.7 (B.02.06)  
 Result Flagging Color:    
 Result Flagging Label: RIN: 9.70

**Fragment table for sample 3 : 1ul\_L793**

| Name | Start Size [nt] | End Size [nt] | Area | % of total Area |
|------|-----------------|---------------|------|-----------------|
| 18S  | 1,657           | 2,177         | 9.2  | 16.2            |
| 28S  | 3,263           | 4,412         | 10.3 | 18.1            |

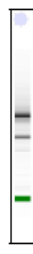

Assay Class: EukaryoteTotal RNA Nano  
 Data Path: D:\...\_EukaryoteTotal RNA Nano\_DE11400731\_2019-03-05\_14-45-22.xad

Created: 3/5/2019 2:45:22 PM  
 Modified: 3/6/2019 12:05:38 PM

**Electropherogram Summary Continued ...**

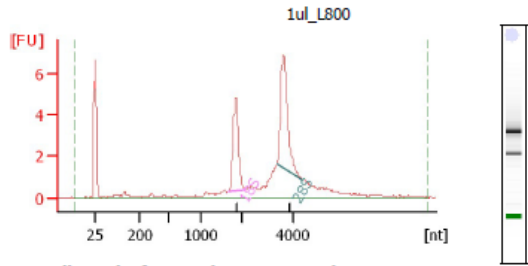

**Overall Results for sample 4 : 1ul\_L800**

RNA Area: 51.6  
 RNA Concentration: 85 ng/ul  
 rRNA Ratio [28s / 18s]: 1.3  
 RNA Integrity Number (RIN): 9.3 (B.02.06)  
 Result Flagging Color:    
 Result Flagging Label: RIN: 9.30

**Fragment table for sample 4 : 1ul\_L800**

| Name | Start Size [nt] | End Size [nt] | Area | % of total Area |
|------|-----------------|---------------|------|-----------------|
| 18S  | 1,667           | 2,149         | 9.2  | 17.8            |
| 28S  | 3,395           | 4,358         | 12.3 | 23.9            |

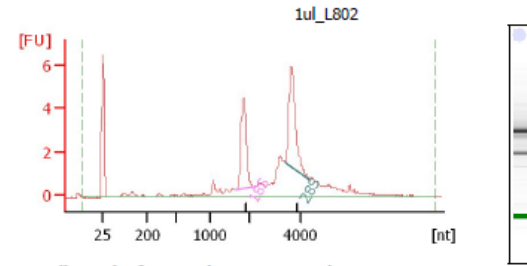

**Overall Results for sample 5 : 1ul\_L802**

RNA Area: 47.7  
 RNA Concentration: 78 ng/ul  
 rRNA Ratio [28s / 18s]: 1.1  
 RNA Integrity Number (RIN): 9.6 (B.02.06)  
 Result Flagging Color:    
 Result Flagging Label: RIN: 9.60

**Fragment table for sample 5 : 1ul\_L802**

| Name | Start Size [nt] | End Size [nt] | Area | % of total Area |
|------|-----------------|---------------|------|-----------------|
| 18S  | 1,634           | 2,206         | 8.5  | 17.8            |
| 28S  | 3,308           | 4,347         | 9.6  | 20.2            |

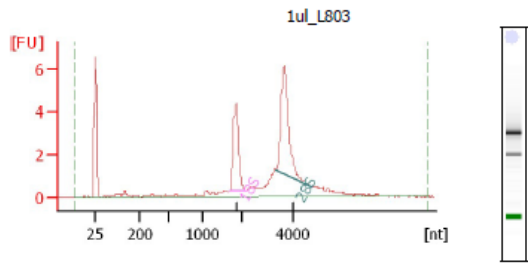

**Overall Results for sample 6 : 1ul\_L803**

RNA Area: 44.7  
 RNA Concentration: 73 ng/ul  
 rRNA Ratio [28s / 18s]: 1.5  
 RNA Integrity Number (RIN): 9.4 (B.02.06)  
 Result Flagging Color:    
 Result Flagging Label: RIN: 9.40

**Fragment table for sample 6 : 1ul\_L803**

| Name | Start Size [nt] | End Size [nt] | Area | % of total Area |
|------|-----------------|---------------|------|-----------------|
| 18S  | 1,695           | 2,122         | 8.4  | 18.7            |
| 28S  | 3,337           | 4,764         | 12.2 | 27.4            |

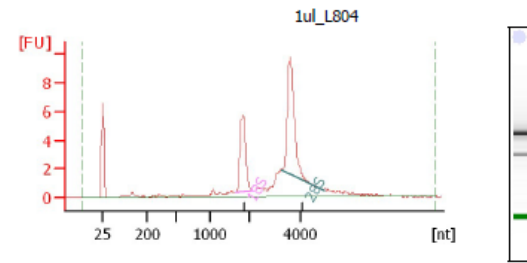

**Overall Results for sample 7 : 1ul\_L804**

RNA Area: 62.4  
 RNA Concentration: 102 ng/ul  
 rRNA Ratio [28s / 18s]: 1.5  
 RNA Integrity Number (RIN): 9.9 (B.02.06)  
 Result Flagging Color:    
 Result Flagging Label: RIN: 9.90

**Fragment table for sample 7 : 1ul\_L804**

| Name | Start Size [nt] | End Size [nt] | Area | % of total Area |
|------|-----------------|---------------|------|-----------------|
| 18S  | 1,660           | 2,136         | 11.3 | 18.2            |
| 28S  | 3,263           | 4,920         | 17.5 | 28.0            |

Assay Class: EukaryoteTotal RNA Nano  
 Data Path: D:\...\_EukaryoteTotal RNA Nano\_DE11400731\_2019-03-05\_14-45-22.xad

Created: 3/5/2019 2:45:22 PM  
 Modified: 3/6/2019 12:05:38 PM

**Electropherogram Summary Continued ...**

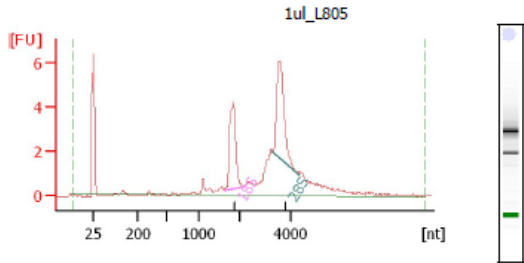

**Overall Results for sample 8 : 1ul\_L805**

RNA Area: 50.1  
 RNA Concentration: 82 ng/ul  
 rRNA Ratio [28s / 18s]: 1.2  
 RNA Integrity Number (RIN): 9.5 (B.02.06)  
 Result Flagging Color:    
 Result Flagging Label: RIN: 9.50

**Fragment table for sample 8 : 1ul\_L805**

| Name | Start Size [nt] | End Size [nt] | Area | % of total Area |
|------|-----------------|---------------|------|-----------------|
| 18S  | 1,597           | 2,177         | 8.6  | 17.1            |
| 28S  | 3,293           | 4,373         | 10.4 | 20.8            |

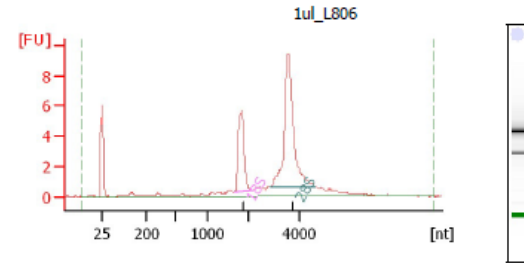

**Overall Results for sample 9 : 1ul\_L806**

RNA Area: 62.1  
 RNA Concentration: 102 ng/ul  
 rRNA Ratio [28s / 18s]: 2.4  
 RNA Integrity Number (RIN): 10 (B.02.06)  
 Result Flagging Color:    
 Result Flagging Label: RIN:10

**Fragment table for sample 9 : 1ul\_L806**

| Name | Start Size [nt] | End Size [nt] | Area | % of total Area |
|------|-----------------|---------------|------|-----------------|
| 18S  | 1,667           | 2,107         | 11.1 | 17.8            |
| 28S  | 2,871           | 4,599         | 26.4 | 42.6            |

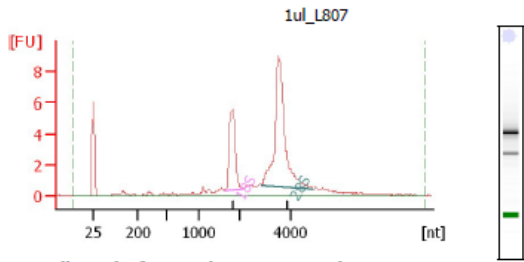

**Overall Results for sample 10 : 1ul\_L807**

RNA Area: 62.7  
 RNA Concentration: 103 ng/ul  
 rRNA Ratio [28s / 18s]: 2.3  
 RNA Integrity Number (RIN): 9.9 (B.02.06)  
 Result Flagging Color:    
 Result Flagging Label: RIN: 9.90

**Fragment table for sample 10 : 1ul\_L807**

| Name | Start Size [nt] | End Size [nt] | Area | % of total Area |
|------|-----------------|---------------|------|-----------------|
| 18S  | 1,632           | 2,107         | 11.3 | 18.0            |
| 28S  | 2,843           | 4,911         | 26.4 | 42.2            |

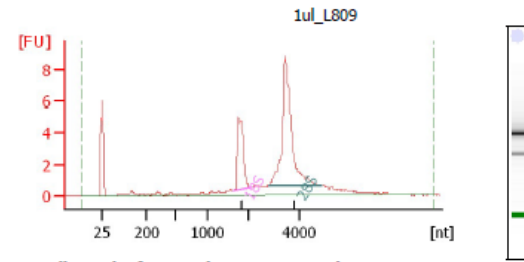

**Overall Results for sample 11 : 1ul\_L809**

RNA Area: 58.6  
 RNA Concentration: 96 ng/ul  
 rRNA Ratio [28s / 18s]: 2.6  
 RNA Integrity Number (RIN): 9.9 (B.02.06)  
 Result Flagging Color:    
 Result Flagging Label: RIN: 9.90

**Fragment table for sample 11 : 1ul\_L809**

| Name | Start Size [nt] | End Size [nt] | Area | % of total Area |
|------|-----------------|---------------|------|-----------------|
| 18S  | 1,623           | 2,107         | 10.1 | 17.3            |
| 28S  | 2,788           | 4,888         | 26.2 | 44.6            |

Assay Class: EukaryoteTotal RNA Nano  
 Data Path: D:\...\_EukaryoteTotal RNA Nano\_DE11400731\_2019-03-05\_14-45-22.xad

Created: 3/5/2019 2:45:22 PM  
 Modified: 3/6/2019 12:05:38 PM

**Electropherogram Summary Continued ...**

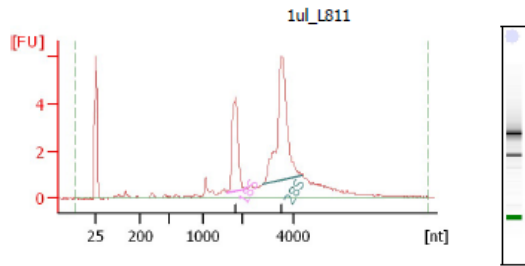

**Overall Results for sample 12 : 1ul\_L811**

RNA Area: 50.2  
 RNA Concentration: 82 ng/μl  
 rRNA Ratio [28s / 18s]: 2.0  
 RNA Integrity Number (RIN): 9.6 (B.02.06)  
 Result Flagging Color:   
 Result Flagging Label: RIN: 9.60

**Fragment table for sample 12 : 1ul\_L811**

| Name | Start Size [nt] | End Size [nt] | Area | % of total Area |
|------|-----------------|---------------|------|-----------------|
| 18S  | 1,568           | 2,093         | 8.5  | 16.9            |
| 28S  | 2,786           | 4,312         | 17.0 | 33.9            |

Assay Class: EukaryoteTotal RNA Nano

Data Path: D:\...\_EukaryoteTotal RNA Nano\_DE11400731\_2019-03-06\_12-36-04.xad

Created: 3/6/2019 12:36:04 PM

Modified: 3/6/2019 12:57:59 PM

**Electrophoresis File Run Summary**

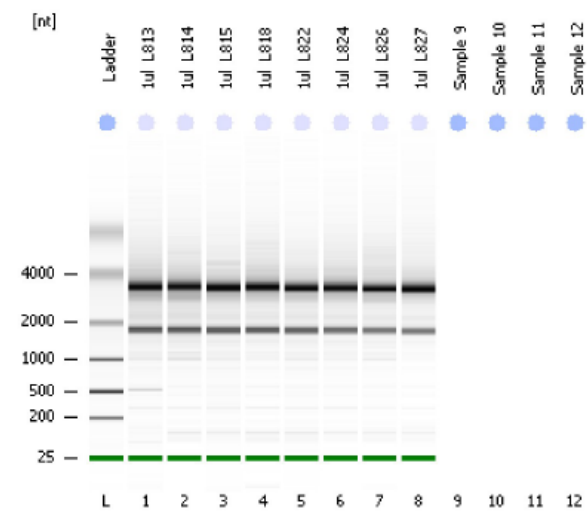

Instrument Information:

Instrument Name: DE11400731      Firmware: C.01.069  
 Serial#: DE11400731      Type: G2938A

Assay Information:

Assay Origin Path: C:\Program Files\Agilent\2100 bioanalyzer\2100 expert\assays\RNA\Eukaryote Total RNA Nano Series II.xsy  
 Title: Eukaryote Total RNA Nano Series II  
 Version: 2.5  
 Assay Comments: Copyright © 2003-2006 Agilent Technologies

Chip Information:

Chip Lot:  
 Reagent Kit Lot:  
 Chip Comments:

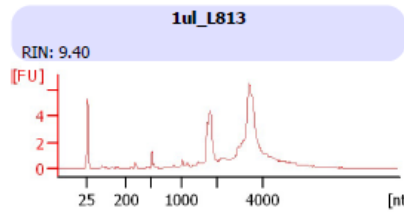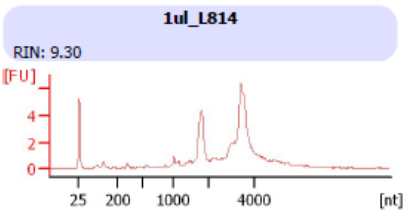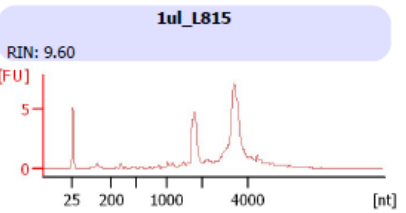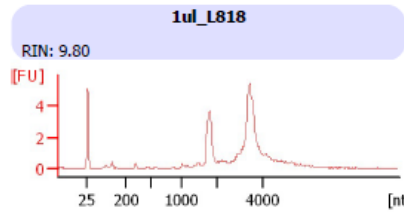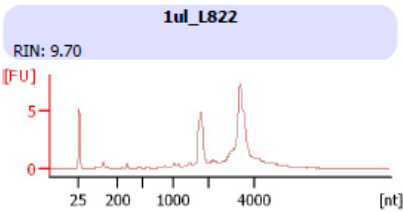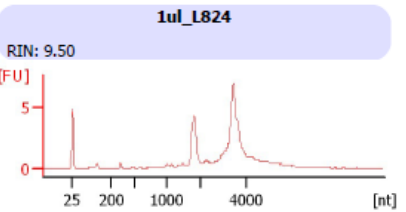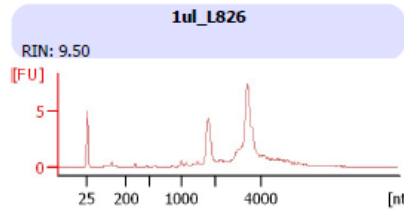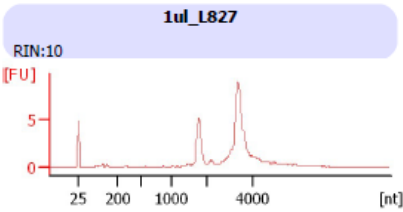



Assay Class: EukaryoteTotal RNA Nano

Data Path: D:\...\_EukaryoteTotal RNA Nano\_DE11400731\_2019-03-06\_12-36-04.xad

Created: 3/6/2019 12:36:04 PM

Modified: 3/6/2019 12:57:59 PM

**Electrophoresis File Run Summary (Chip Summary)**

| Sample Name | Sample Comment | Status | Result Label | Result Color |
|-------------|----------------|--------|--------------|--------------|
| 1ul_L813    |                | ✓      | RIN: 9.40    |              |
| 1ul_L814    |                | ✓      | RIN: 9.30    |              |
| 1ul_L815    |                | ✓      | RIN: 9.60    |              |
| 1ul_L818    |                | ✓      | RIN: 9.80    |              |
| 1ul_L822    |                | ✓      | RIN: 9.70    |              |
| 1ul_L824    |                | ✓      | RIN: 9.50    |              |
| 1ul_L826    |                | ✓      | RIN: 9.50    |              |
| 1ul_L827    |                | ✓      | RIN:10       |              |
| Sample 9    |                |        |              |              |
| Sample 10   |                |        |              |              |
| Sample 11   |                |        |              |              |
| Sample 12   |                |        |              |              |

Chip Lot #

Reagent Kit Lot #

Chip Comments :

Assay Class: EukaryoteTotal RNA Nano  
 Data Path: D:\...\_EukaryoteTotal RNA Nano\_DE11400731\_2019-03-06\_12-36-04.xad

Created: 3/6/2019 12:36:04 PM  
 Modified: 3/6/2019 12:57:59 PM

**Electropherogram Summary**

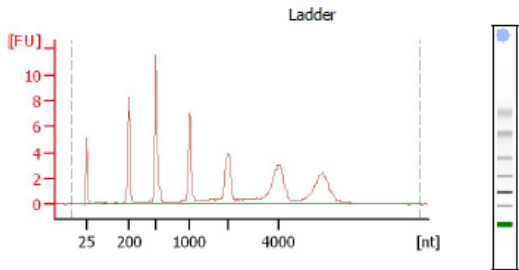

**Overall Results for Ladder**

RNA Area: 86.4  
 RNA Concentration: 150 ng/μl  
 Result Flagging Color:    
 Result Flagging Label: All Other Samples

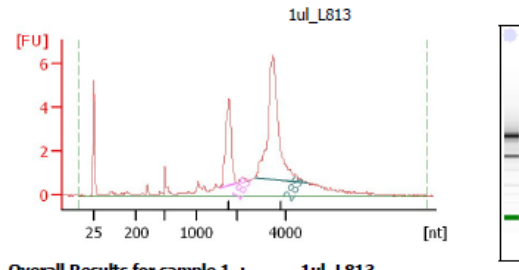

**Overall Results for sample 1 : 1ul\_L813**

RNA Area: 63.0  
 RNA Concentration: 109 ng/μl  
 rRNA Ratio [28s / 18s]: 2.3  
 RNA Integrity Number (RIN): 9.4 (A.01.01, Anomaly Threshold(s) manually adapted)  
 Result Flagging Color:    
 Result Flagging Label: RIN: 9.40

**Fragment table for sample 1 : 1ul\_L813**

| Name | Start Size [nt] | End Size [nt] | Area | % of total Area |
|------|-----------------|---------------|------|-----------------|
| 18S  | 1,574           | 2,087         | 9.2  | 14.6            |
| 28S  | 2,751           | 4,845         | 21.2 | 33.7            |

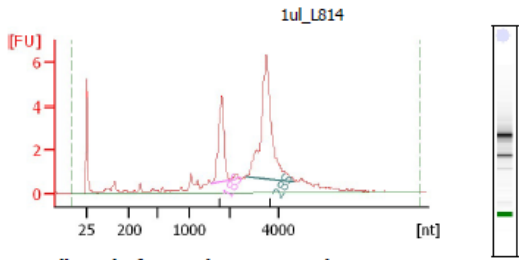

**Overall Results for sample 2 : 1ul\_L814**

RNA Area: 61.5  
 RNA Concentration: 107 ng/μl  
 rRNA Ratio [28s / 18s]: 2.3  
 RNA Integrity Number (RIN): 9.3 (A.01.01)  
 Result Flagging Color:    
 Result Flagging Label: RIN: 9.30

**Fragment table for sample 2 : 1ul\_L814**

| Name | Start Size [nt] | End Size [nt] | Area | % of total Area |
|------|-----------------|---------------|------|-----------------|
| 18S  | 1,547           | 2,043         | 9.1  | 14.8            |
| 28S  | 2,722           | 4,619         | 20.8 | 33.5            |

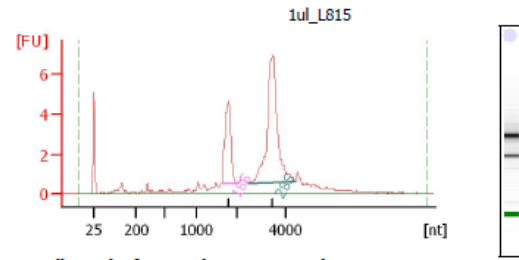

**Overall Results for sample 3 : 1ul\_L815**

RNA Area: 60.7  
 RNA Concentration: 105 ng/μl  
 rRNA Ratio [28s / 18s]: 2.2  
 RNA Integrity Number (RIN): 9.6 (A.01.01)  
 Result Flagging Color:    
 Result Flagging Label: RIN: 9.60

**Fragment table for sample 3 : 1ul\_L815**

| Name | Start Size [nt] | End Size [nt] | Area | % of total Area |
|------|-----------------|---------------|------|-----------------|
| 18S  | 1,637           | 2,015         | 10.1 | 16.6            |
| 28S  | 2,524           | 4,406         | 22.7 | 37.3            |

Assay Class: EukaryoteTotal RNA Nano  
 Data Path: D:\...\_EukaryoteTotal RNA Nano\_DE11400731\_2019-03-06\_12-36-04.xad

Created: 3/6/2019 12:36:04 PM  
 Modified: 3/6/2019 12:57:59 PM

Electropherogram Summary Continued ...

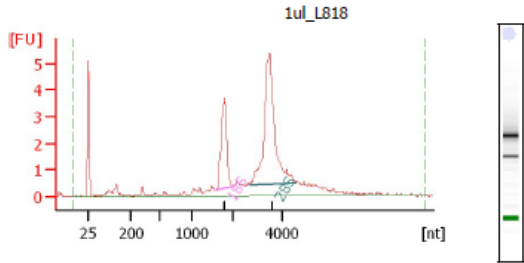

Overall Results for sample 4 : 1ul\_L818

RNA Area: 46.8  
 RNA Concentration: 81 ng/µl  
 rRNA Ratio [28s / 18s]: 2.2  
 RNA Integrity Number (RIN): 9.8 (A.01.01)  
 Result Flagging Color:    
 Result Flagging Label: RIN: 9.80

Fragment table for sample 4 : 1ul\_L818

| Name | Start Size [nt] | End Size [nt] | Area | % of total Area |
|------|-----------------|---------------|------|-----------------|
| 18S  | 1,574           | 2,015         | 7.6  | 16.3            |
| 28S  | 2,736           | 4,534         | 18.9 | 38.2            |

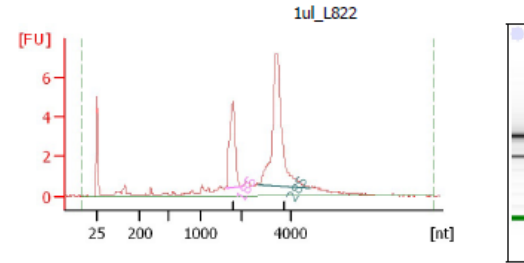

Overall Results for sample 5 : 1ul\_L822

RNA Area: 56.1  
 RNA Concentration: 97 ng/µl  
 rRNA Ratio [28s / 18s]: 2.2  
 RNA Integrity Number (RIN): 9.7 (A.01.01)  
 Result Flagging Color:    
 Result Flagging Label: RIN: 9.70

Fragment table for sample 5 : 1ul\_L822

| Name | Start Size [nt] | End Size [nt] | Area | % of total Area |
|------|-----------------|---------------|------|-----------------|
| 18S  | 1,628           | 2,029         | 9.9  | 17.6            |
| 28S  | 2,736           | 4,780         | 21.4 | 38.2            |

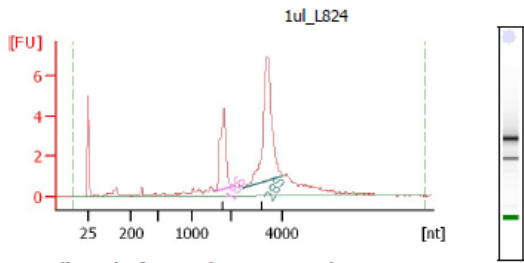

Overall Results for sample 6 : 1ul\_L824

RNA Area: 56.1  
 RNA Concentration: 97 ng/µl  
 rRNA Ratio [28s / 18s]: 2.0  
 RNA Integrity Number (RIN): 9.5 (A.01.01)  
 Result Flagging Color:    
 Result Flagging Label: RIN: 9.50

Fragment table for sample 6 : 1ul\_L824

| Name | Start Size [nt] | End Size [nt] | Area | % of total Area |
|------|-----------------|---------------|------|-----------------|
| 18S  | 1,545           | 2,028         | 8.8  | 15.7            |
| 28S  | 2,496           | 4,014         | 17.8 | 31.8            |

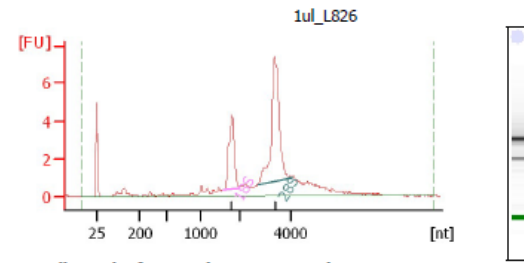

Overall Results for sample 7 : 1ul\_L826

RNA Area: 53.3  
 RNA Concentration: 93 ng/µl  
 rRNA Ratio [28s / 18s]: 2.1  
 RNA Integrity Number (RIN): 9.5 (A.01.01)  
 Result Flagging Color:    
 Result Flagging Label: RIN: 9.50

Fragment table for sample 7 : 1ul\_L826

| Name | Start Size [nt] | End Size [nt] | Area | % of total Area |
|------|-----------------|---------------|------|-----------------|
| 18S  | 1,545           | 1,990         | 8.3  | 15.6            |
| 28S  | 2,709           | 4,070         | 17.8 | 33.3            |

Assay Class: EukaryoteTotal RNA Nano  
 Data Path: D:\...\_EukaryoteTotal RNA Nano\_DE11400731\_2019-03-06\_12-36-04.xad

Created: 3/6/2019 12:36:04 PM  
 Modified: 3/6/2019 12:57:59 PM

**Electropherogram Summary Continued ...**

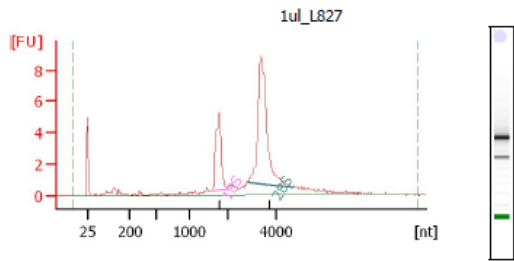

**Overall Results for sample 8 : 1ul\_L827**

RNA Area: 59.7  
 RNA Concentration: 104 ng/ul  
 rRNA Ratio [28s / 18s]: 2.6  
 RNA Integrity Number (RIN): 10 (A.01.01)  
 Result Flagging Color:    
 Result Flagging Label: RIN:10

**Fragment table for sample 8 : 1ul\_L827**

| Name | Start Size [nt] | End Size [nt] | Area | % of total Area |
|------|-----------------|---------------|------|-----------------|
| 18S  | 1,616           | 1,909         | 10.1 | 16.9            |
| 28S  | 2,809           | 4,643         | 25.9 | 43.3            |

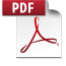

Acrobat Document

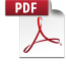

Acrobat Document

Assay Class: EukaryoteTotal RNA Nano  
 Data Path: D:\...\_EukaryoteTotal RNA Nano\_DE11400731\_2019-01-08\_08-36-54.xad

Created: 1/8/2019 8:36:54 AM  
 Modified: 1/8/2019 9:04:26 AM

**Electrophoresis File Run Summary**

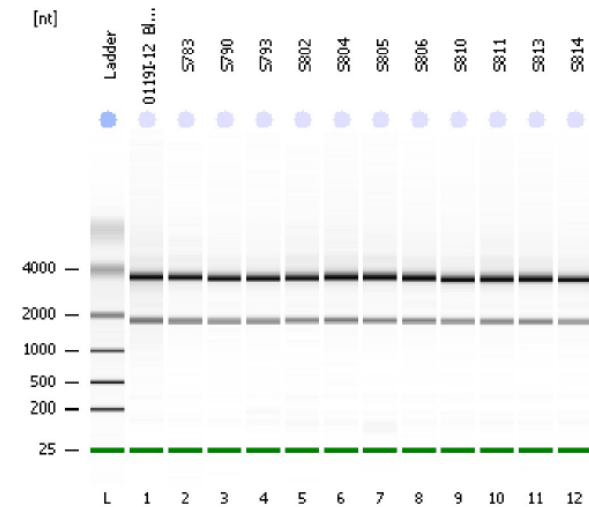

Instrument Information:

Instrument Name: DE11400731      Firmware: C.01.069  
 Serial#: DE11400731      Type: G2938A

Assay Information:

Assay Origin Path: C:\Program Files\Agilent\2100 bioanalyzer\2100 expert\assays\RNA\Eukaryote Total RNA Nano Series II.xsy  
 Title: Eukaryote Total RNA Nano Series II  
 Version: 2.5  
 Assay Comments: Copyright © 2003-2006 Agilent Technologies

Chip Information:

Chip Lot:  
 Reagent Kit Lot:  
 Chip Comments:

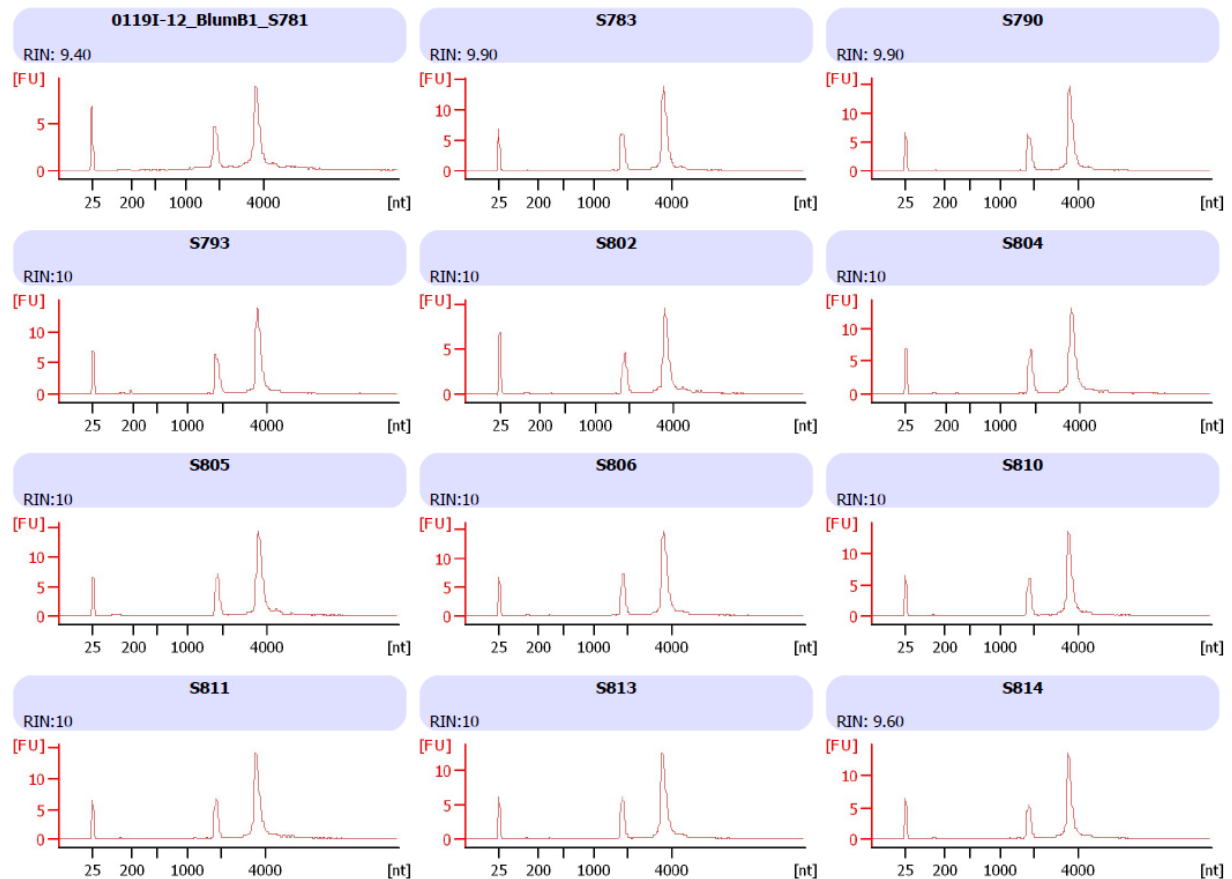

Assay Class: EukaryoteTotal RNA Nano  
 Data Path: D:\...\_EukaryoteTotal RNA Nano\_DE11400731\_2019-01-08\_08-36-54.xad

Created: 1/8/2019 8:36:54 AM  
 Modified: 1/8/2019 9:04:26 AM

**Electrophoresis File Run Summary (Chip Summary)**

| Sample Name          | Sample Comment | Status | Result Label | Result Color |
|----------------------|----------------|--------|--------------|--------------|
| 0119I-12_BlumB1_S781 |                | ✓      | RIN: 9.40    |              |
| S783                 |                | ✓      | RIN: 9.90    |              |
| S790                 |                | ✓      | RIN: 9.90    |              |
| S793                 |                | ✓      | RIN:10       |              |
| S802                 |                | ✓      | RIN:10       |              |
| S804                 |                | ✓      | RIN:10       |              |
| S805                 |                | ✓      | RIN:10       |              |
| S806                 |                | ✓      | RIN:10       |              |
| S810                 |                | ✓      | RIN:10       |              |
| S811                 |                | ✓      | RIN:10       |              |
| S813                 |                | ✓      | RIN:10       |              |
| S814                 |                | ✓      | RIN: 9.60    |              |

Chip Lot #

Reagent Kit Lot #

Chip Comments :

Assay Class: EukaryoteTotal RNA Nano  
 Data Path: D:\...\_EukaryoteTotal RNA Nano\_DE11400731\_2019-01-08\_08-36-54.xad

Created: 1/8/2019 8:36:54 AM  
 Modified: 1/8/2019 9:04:26 AM

**Electropherogram Summary**

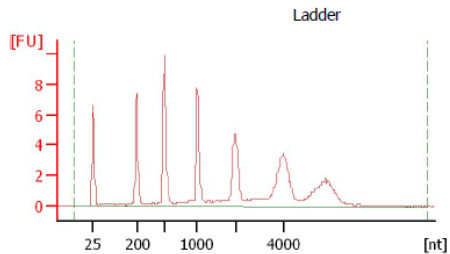

**Overall Results for Ladder**

RNA Area: 85.1  
 RNA Concentration: 150 ng/µl  
 Result Flagging Color:   
 Result Flagging Label: All Other Samples

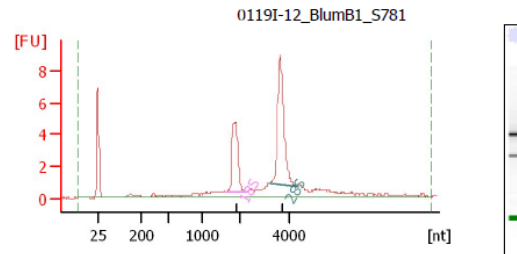

**Overall Results for sample 1 : 0119I-12\_BlumB1\_S781**

RNA Area: 53.4  
 RNA Concentration: 94 ng/µl  
 rRNA Ratio [28s / 18s]: 1.7  
 RNA Integrity Number (RIN): 9.4 (A.01.01)  
 Result Flagging Color:   
 Result Flagging Label: RIN: 9.40

**Fragment table for sample 1 : 0119I-12\_BlumB1\_S781**

| Name | Start Size [nt] | End Size [nt] | Area | % of total Area |
|------|-----------------|---------------|------|-----------------|
| 18S  | 1,626           | 2,224         | 10.4 | 19.4            |
| 28S  | 3,197           | 4,333         | 17.1 | 32.1            |

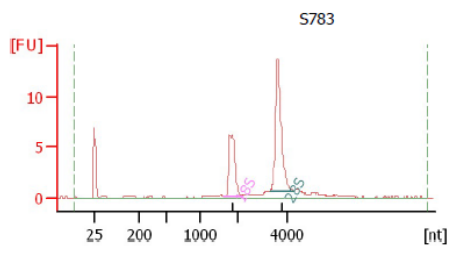

**Overall Results for sample 2 : S783**

RNA Area: 55.6  
 RNA Concentration: 98 ng/µl  
 rRNA Ratio [28s / 18s]: 1.8  
 RNA Integrity Number (RIN): 9.9 (A.01.01)  
 Result Flagging Color:   
 Result Flagging Label: RIN: 9.90

**Fragment table for sample 2 : S783**

| Name | Start Size [nt] | End Size [nt] | Area | % of total Area |
|------|-----------------|---------------|------|-----------------|
| 18S  | 1,611           | 2,196         | 13.8 | 24.9            |
| 28S  | 3,283           | 4,267         | 24.7 | 44.5            |

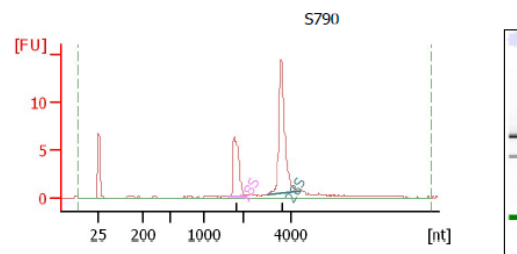

**Overall Results for sample 3 : S790**

RNA Area: 53.5  
 RNA Concentration: 94 ng/µl  
 rRNA Ratio [28s / 18s]: 2.1  
 RNA Integrity Number (RIN): 9.9 (A.01.01, Anomaly Threshold(s) manually adapted)  
 Result Flagging Color:   
 Result Flagging Label: RIN: 9.90

**Fragment table for sample 3 : S790**

| Name | Start Size [nt] | End Size [nt] | Area | % of total Area |
|------|-----------------|---------------|------|-----------------|
| 18S  | 1,631           | 2,154         | 13.2 | 24.6            |
| 28S  | 2,974           | 4,336         | 27.8 | 51.9            |



Assay Class: EukaryoteTotal RNA Nano  
 Data Path: D:\...\EukaryoteTotal RNA Nano\_DE11400731\_2019-01-08\_08-36-54.xad

Created: 1/8/2019 8:36:54 AM  
 Modified: 1/8/2019 9:04:26 AM

**Electropherogram Summary Continued ...**

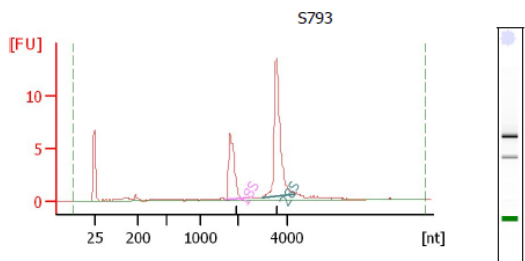

**Overall Results for sample 4 : S793**

RNA Area: 53.4  
 RNA Concentration: 94 ng/ul  
 rRNA Ratio [28s / 18s]: 2.1  
 RNA Integrity Number (RIN): 10 (A.01.01)  
 Result Flagging Color:    
 Result Flagging Label: RIN:10

**Fragment table for sample 4 : S793**

| Name | Start Size [nt] | End Size [nt] | Area | % of total Area |
|------|-----------------|---------------|------|-----------------|
| 18S  | 1,689           | 2,330         | 12.6 | 23.7            |
| 28S  | 2,988           | 4,333         | 26.1 | 48.8            |

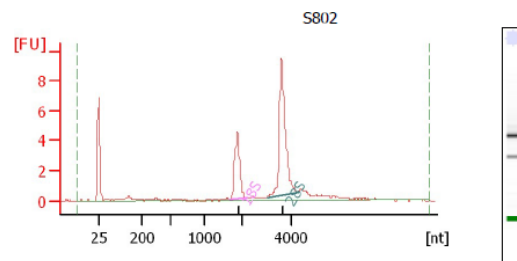

**Overall Results for sample 5 : S802**

RNA Area: 41.7  
 RNA Concentration: 73 ng/ul  
 rRNA Ratio [28s / 18s]: 2.1  
 RNA Integrity Number (RIN): 10 (A.01.01)  
 Result Flagging Color:    
 Result Flagging Label: RIN:10

**Fragment table for sample 5 : S802**

| Name | Start Size [nt] | End Size [nt] | Area | % of total Area |
|------|-----------------|---------------|------|-----------------|
| 18S  | 1,663           | 2,200         | 8.9  | 21.3            |
| 28S  | 3,002           | 4,256         | 18.6 | 44.7            |

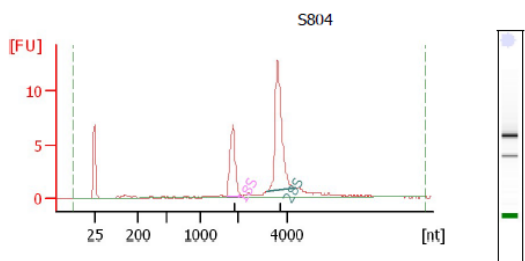

**Overall Results for sample 6 : S804**

RNA Area: 60.5  
 RNA Concentration: 107 ng/ul  
 rRNA Ratio [28s / 18s]: 2.1  
 RNA Integrity Number (RIN): 10 (A.01.01)  
 Result Flagging Color:    
 Result Flagging Label: RIN:10

**Fragment table for sample 6 : S804**

| Name | Start Size [nt] | End Size [nt] | Area | % of total Area |
|------|-----------------|---------------|------|-----------------|
| 18S  | 1,726           | 2,169         | 13.0 | 21.5            |
| 28S  | 3,193           | 4,398         | 26.8 | 44.3            |

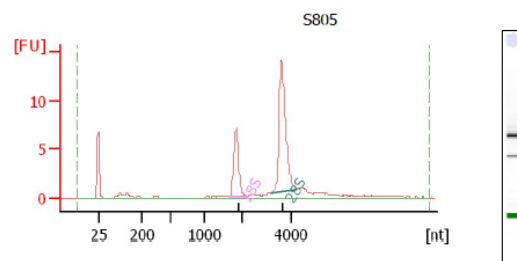

**Overall Results for sample 7 : S805**

RNA Area: 60.1  
 RNA Concentration: 106 ng/ul  
 rRNA Ratio [28s / 18s]: 2.2  
 RNA Integrity Number (RIN): 10 (A.01.01)  
 Result Flagging Color:    
 Result Flagging Label: RIN:10

**Fragment table for sample 7 : S805**

| Name | Start Size [nt] | End Size [nt] | Area | % of total Area |
|------|-----------------|---------------|------|-----------------|
| 18S  | 1,680           | 2,228         | 12.9 | 21.5            |
| 28S  | 3,178           | 4,230         | 28.8 | 47.9            |

Assay Class: EukaryoteTotal RNA Nano  
 Data Path: D:\...\_EukaryoteTotal RNA Nano\_DE11400731\_2019-01-08\_08-36-54.xad

Created: 1/8/2019 8:36:54 AM  
 Modified: 1/8/2019 9:04:26 AM

**Electropherogram Summary Continued ...**

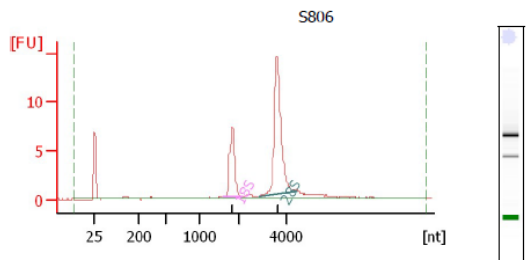

**Overall Results for sample 8 : S806**

RNA Area: 64.0  
 RNA Concentration: 113 ng/µl  
 rRNA Ratio [28s / 18s]: 2.3  
 RNA Integrity Number (RIN): 10 (A.01.01)  
 Result Flagging Color:    
 Result Flagging Label: RIN:10

**Fragment table for sample 8 : S806**

| Name | Start Size [nt] | End Size [nt] | Area | % of total Area |
|------|-----------------|---------------|------|-----------------|
| 18S  | 1,613           | 2,168         | 13.8 | 21.5            |
| 28S  | 2,886           | 4,424         | 31.6 | 49.4            |

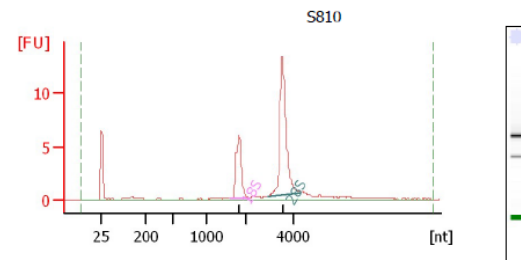

**Overall Results for sample 9 : S810**

RNA Area: 54.1  
 RNA Concentration: 95 ng/µl  
 rRNA Ratio [28s / 18s]: 2.3  
 RNA Integrity Number (RIN): 10 (A.01.01, Anomaly Threshold(s) manually adapted)  
 Result Flagging Color:    
 Result Flagging Label: RIN:10

**Fragment table for sample 9 : S810**

| Name | Start Size [nt] | End Size [nt] | Area | % of total Area |
|------|-----------------|---------------|------|-----------------|
| 18S  | 1,631           | 2,154         | 11.8 | 21.8            |
| 28S  | 2,930           | 4,278         | 26.8 | 49.6            |

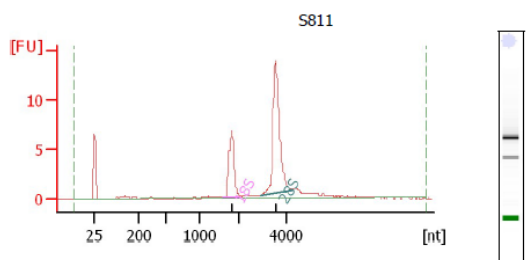

**Overall Results for sample 10 : S811**

RNA Area: 63.5  
 RNA Concentration: 112 ng/µl  
 rRNA Ratio [28s / 18s]: 2.2  
 RNA Integrity Number (RIN): 10 (A.01.01)  
 Result Flagging Color:    
 Result Flagging Label: RIN:10

**Fragment table for sample 10 : S811**

| Name | Start Size [nt] | End Size [nt] | Area | % of total Area |
|------|-----------------|---------------|------|-----------------|
| 18S  | 1,631           | 2,110         | 13.0 | 20.4            |
| 28S  | 2,945           | 4,249         | 28.9 | 45.5            |

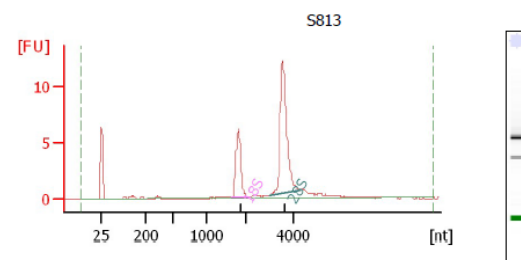

**Overall Results for sample 11 : S813**

RNA Area: 51.2  
 RNA Concentration: 90 ng/µl  
 rRNA Ratio [28s / 18s]: 2.2  
 RNA Integrity Number (RIN): 10 (A.01.01)  
 Result Flagging Color:    
 Result Flagging Label: RIN:10

**Fragment table for sample 11 : S813**

| Name | Start Size [nt] | End Size [nt] | Area | % of total Area |
|------|-----------------|---------------|------|-----------------|
| 18S  | 1,678           | 2,154         | 11.4 | 22.3            |
| 28S  | 2,974           | 4,278         | 25.6 | 50.0            |

Assay Class: EukaryoteTotal RNA Nano  
 Data Path: D:\...\EukaryoteTotal RNA Nano\_DE11400731\_2019-01-08\_08-36-54.xad

Created: 1/8/2019 8:36:54 AM  
 Modified: 1/8/2019 9:04:26 AM

**Electropherogram Summary Continued ...**

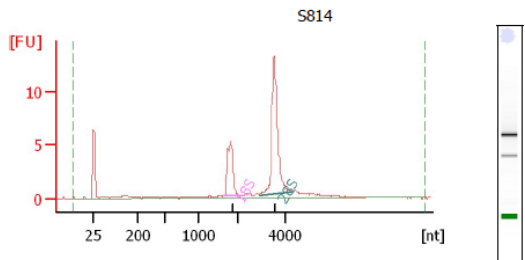

**Overall Results for sample 12 : S814**

RNA Area: 51.7  
 RNA Concentration: 91 ng/ul  
 rRNA Ratio [28s / 18s]: 2.3  
 RNA Integrity Number (RIN): 9.6 (A.01.01)  
 Result Flagging Color:    
 Result Flagging Label: RIN: 9.60

**Fragment table for sample 12 : S814**

| Name | Start Size [nt] | End Size [nt] | Area | % of total Area |
|------|-----------------|---------------|------|-----------------|
| 18S  | 1,669           | 2,168         | 10.9 | 21.1            |
| 28S  | 2,915           | 4,234         | 24.7 | 47.7            |

Assay Class: EukaryoteTotal RNA Nano  
 Data Path: D:\...\_EukaryoteTotal RNA Nano\_DE11400731\_2019-01-08\_10-06-07.xad

Created: 1/8/2019 10:06:07 AM  
 Modified: 1/8/2019 3:03:10 PM

**Electrophoresis File Run Summary**

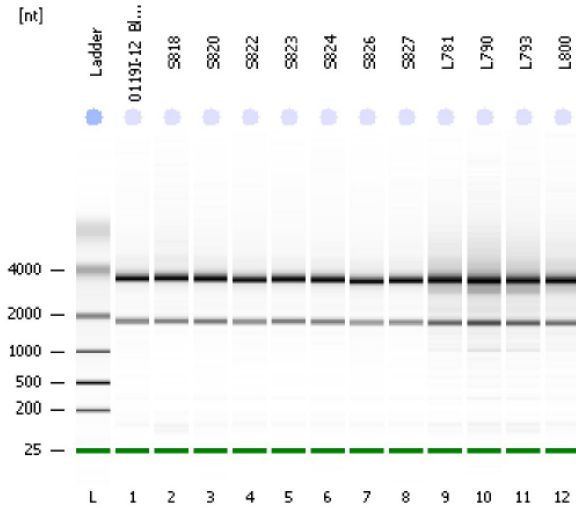

Instrument Information:

Instrument Name: DE11400731      Firmware: C.01.069  
 Serial#: DE11400731      Type: G2938A

Assay Information:

Assay Origin Path: C:\Program Files\Agilent\2100 bioanalyzer\2100 expert\assays\RNA\Eukaryote Total RNA Nano Series II.xsy  
 Title: Eukaryote Total RNA Nano Series II  
 Version: 2.5  
 Assay Comments: Copyright © 2003-2006 Agilent Technologies

Chip Information:

Chip Lot:  
 Reagent Kit Lot:  
 Chip Comments:

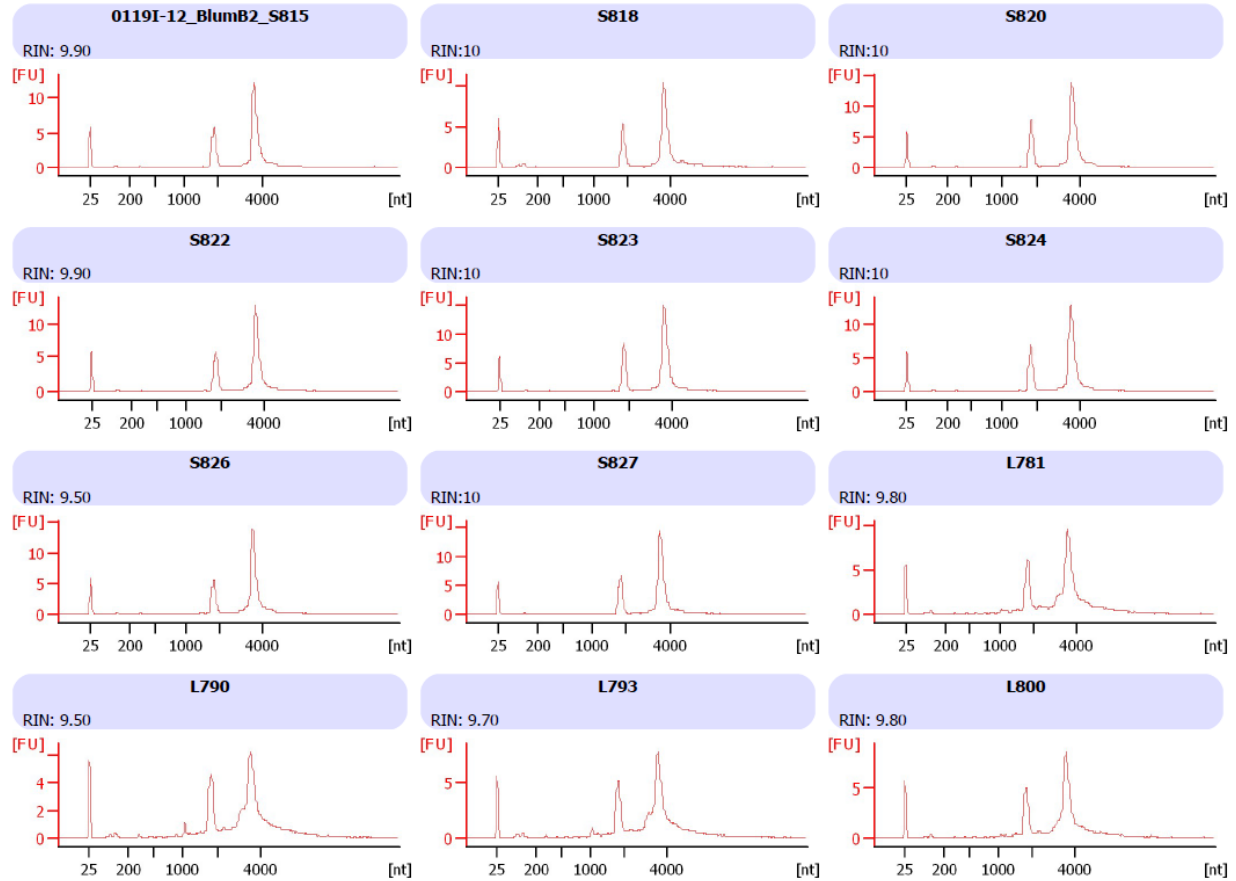

Assay Class: EukaryoteTotal RNA Nano  
 Data Path: D:\...\EukaryoteTotal RNA Nano\_DE11400731\_2019-01-08\_10-06-07.xad

Created: 1/8/2019 10:06:07 AM  
 Modified: 1/8/2019 3:03:10 PM

**Electrophoresis File Run Summary (Chip Summary)**

| Sample Name          | Sample Comment | Status | Result Label | Result Color |
|----------------------|----------------|--------|--------------|--------------|
| 0119I-12_BlumB2_S815 |                | ✓      | RIN: 9.90    |              |
| S818                 |                | ✓      | RIN:10       |              |
| S820                 |                | ✓      | RIN:10       |              |
| S822                 |                | ✓      | RIN: 9.90    |              |
| S823                 |                | ✓      | RIN:10       |              |
| S824                 |                | ✓      | RIN:10       |              |
| S826                 |                | ✓      | RIN: 9.50    |              |
| S827                 |                | ✓      | RIN:10       |              |
| L781                 |                | ✓      | RIN: 9.80    |              |
| L790                 |                | ✓      | RIN: 9.50    |              |
| L793                 |                | ✓      | RIN: 9.70    |              |
| L800                 |                | ✓      | RIN: 9.80    |              |

Chip Lot #

Reagent Kit Lot #

Chip Comments :

Assay Class: EukaryoteTotal RNA Nano  
 Data Path: D:\...\_EukaryoteTotal RNA Nano\_DE11400731\_2019-01-08\_10-06-07.xad

Created: 1/8/2019 10:06:07 AM  
 Modified: 1/8/2019 3:03:10 PM

**Electropherogram Summary**

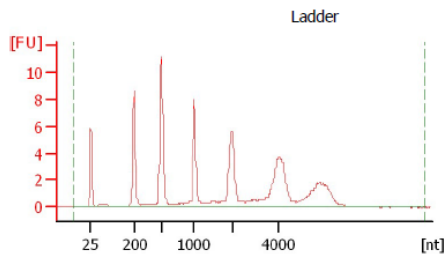

**Overall Results for Ladder**

RNA Area: 91.2  
 RNA Concentration: 150 ng/ul  
 Result Flagging Color:   
 Result Flagging Label: All Other Samples

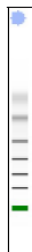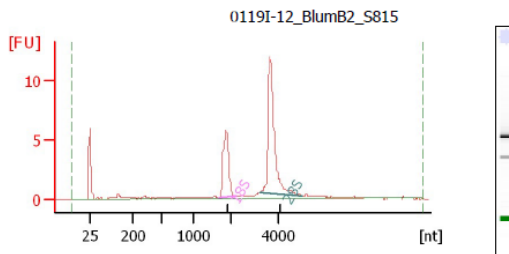

**Overall Results for sample 1 : 0119I-12\_BlumB2\_S815**

RNA Area: 52.4  
 RNA Concentration: 86 ng/ul  
 rRNA Ratio [28s / 18s]: 2.2  
 RNA Integrity Number (RIN): 9.9 (A.01.01)  
 Result Flagging Color:   
 Result Flagging Label: RIN: 9.90

**Fragment table for sample 1 : 0119I-12\_BlumB2\_S815**

| Name | Start Size [nt] | End Size [nt] | Area | % of total Area |
|------|-----------------|---------------|------|-----------------|
| 18S  | 1,685           | 2,199         | 12.0 | 23.0            |
| 28S  | 3,179           | 5,019         | 25.9 | 49.4            |

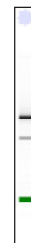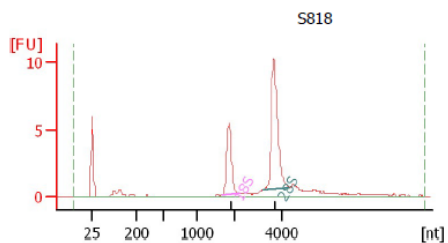

**Overall Results for sample 2 : S818**

RNA Area: 49.7  
 RNA Concentration: 82 ng/ul  
 rRNA Ratio [28s / 18s]: 2.1  
 RNA Integrity Number (RIN): 10 (A.01.01)  
 Result Flagging Color:   
 Result Flagging Label: RIN:10

**Fragment table for sample 2 : S818**

| Name | Start Size [nt] | End Size [nt] | Area | % of total Area |
|------|-----------------|---------------|------|-----------------|
| 18S  | 1,697           | 2,216         | 9.8  | 19.7            |
| 28S  | 3,192           | 4,288         | 20.7 | 41.5            |

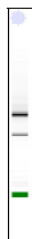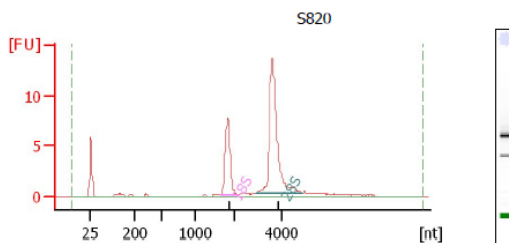

**Overall Results for sample 3 : S820**

RNA Area: 66.0  
 RNA Concentration: 109 ng/ul  
 rRNA Ratio [28s / 18s]: 2.3  
 RNA Integrity Number (RIN): 10 (A.01.01)  
 Result Flagging Color:   
 Result Flagging Label: RIN:10

**Fragment table for sample 3 : S820**

| Name | Start Size [nt] | End Size [nt] | Area | % of total Area |
|------|-----------------|---------------|------|-----------------|
| 18S  | 1,662           | 2,142         | 14.4 | 21.8            |
| 28S  | 2,936           | 4,868         | 33.4 | 50.5            |

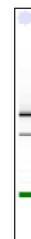

Assay Class: EukaryoteTotal RNA Nano  
 Data Path: D:\...\_EukaryoteTotal RNA Nano\_DE11400731\_2019-01-08\_10-06-07.xad

Created: 1/8/2019 10:06:07 AM  
 Modified: 1/8/2019 3:03:10 PM

**Electropherogram Summary Continued ...**

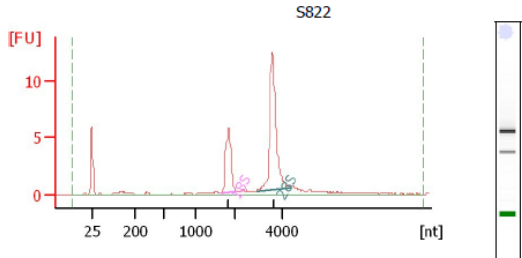

**Overall Results for sample 4 : S822**

RNA Area: 51.0  
 RNA Concentration: 84 ng/ul  
 rRNA Ratio [28s / 18s]: 2.1  
 RNA Integrity Number (RIN): 9.9 (A.01.01)  
 Result Flagging Color:    
 Result Flagging Label: RIN: 9.90

**Fragment table for sample 4 : S822**

| Name | Start Size [nt] | End Size [nt] | Area | % of total Area |
|------|-----------------|---------------|------|-----------------|
| 18S  | 1,655           | 2,098         | 11.8 | 23.2            |
| 28S  | 2,935           | 4,355         | 25.0 | 49.0            |

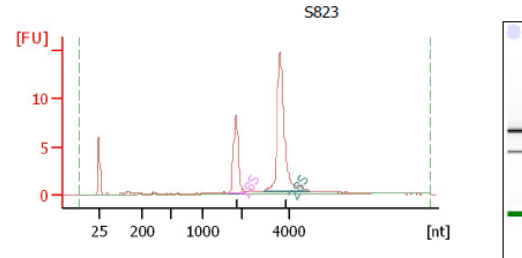

**Overall Results for sample 5 : S823**

RNA Area: 62.8  
 RNA Concentration: 103 ng/ul  
 rRNA Ratio [28s / 18s]: 2.3  
 RNA Integrity Number (RIN): 10 (A.01.01, Anomaly Threshold(s) manually adapted)  
 Result Flagging Color:    
 Result Flagging Label: RIN:10

**Fragment table for sample 5 : S823**

| Name | Start Size [nt] | End Size [nt] | Area | % of total Area |
|------|-----------------|---------------|------|-----------------|
| 18S  | 1,645           | 2,143         | 15.1 | 24.0            |
| 28S  | 2,920           | 4,863         | 35.1 | 55.8            |

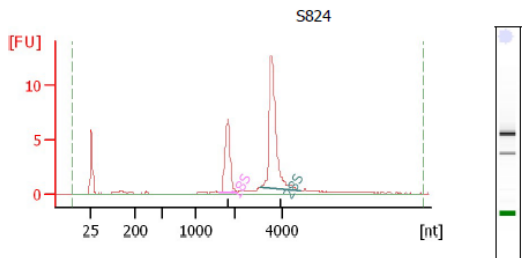

**Overall Results for sample 6 : S824**

RNA Area: 58.7  
 RNA Concentration: 97 ng/ul  
 rRNA Ratio [28s / 18s]: 2.2  
 RNA Integrity Number (RIN): 10 (A.01.01)  
 Result Flagging Color:    
 Result Flagging Label: RIN:10

**Fragment table for sample 6 : S824**

| Name | Start Size [nt] | End Size [nt] | Area | % of total Area |
|------|-----------------|---------------|------|-----------------|
| 18S  | 1,625           | 2,127         | 13.0 | 22.1            |
| 28S  | 3,130           | 4,793         | 28.2 | 47.9            |

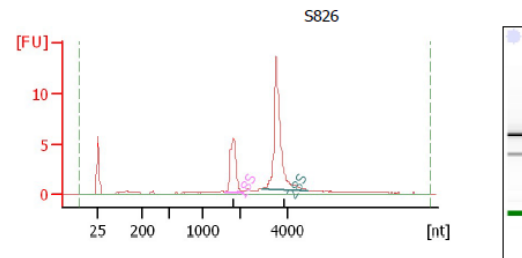

**Overall Results for sample 7 : S826**

RNA Area: 59.4  
 RNA Concentration: 98 ng/ul  
 rRNA Ratio [28s / 18s]: 2.6  
 RNA Integrity Number (RIN): 9.5 (A.01.01, Anomaly Threshold(s) manually adapted)  
 Result Flagging Color:    
 Result Flagging Label: RIN: 9.50

**Fragment table for sample 7 : S826**

| Name | Start Size [nt] | End Size [nt] | Area | % of total Area |
|------|-----------------|---------------|------|-----------------|
| 18S  | 1,577           | 2,095         | 11.6 | 19.6            |
| 28S  | 2,906           | 4,843         | 29.9 | 50.3            |

Assay Class: EukaryoteTotal RNA Nano  
 Data Path: D:\...\_EukaryoteTotal RNA Nano\_DE11400731\_2019-01-08\_10-06-07.xad

Created: 1/8/2019 10:06:07 AM  
 Modified: 1/8/2019 3:03:10 PM

**Electropherogram Summary Continued ...**

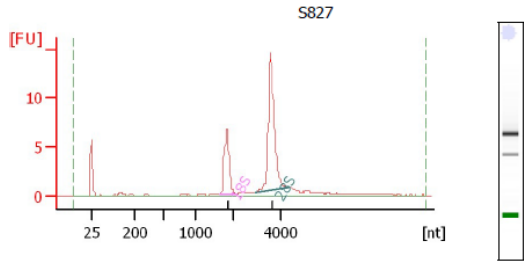

**Overall Results for sample 8 : S827**

RNA Area: 63.4  
 RNA Concentration: 104 ng/ul  
 rRNA Ratio [28s / 18s]: 2.3  
 RNA Integrity Number (RIN): 10 (A.01.01)  
 Result Flagging Color:    
 Result Flagging Label: RIN:10

**Fragment table for sample 8 : S827**

| Name | Start Size [nt] | End Size [nt] | Area | % of total Area |
|------|-----------------|---------------|------|-----------------|
| 18S  | 1,638           | 2,138         | 13.2 | 20.8            |
| 28S  | 2,938           | 4,325         | 30.3 | 47.8            |

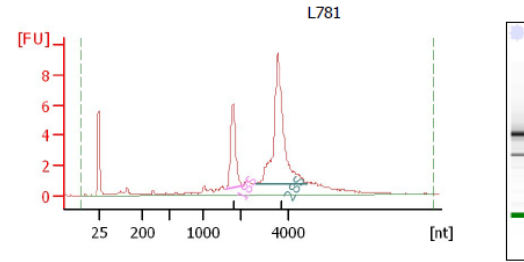

**Overall Results for sample 9 : L781**

RNA Area: 72.7  
 RNA Concentration: 120 ng/ul  
 rRNA Ratio [28s / 18s]: 2.6  
 RNA Integrity Number (RIN): 9.8 (A.01.01)  
 Result Flagging Color:    
 Result Flagging Label: RIN: 9.80

**Fragment table for sample 9 : L781**

| Name | Start Size [nt] | End Size [nt] | Area | % of total Area |
|------|-----------------|---------------|------|-----------------|
| 18S  | 1,618           | 2,092         | 11.2 | 15.5            |
| 28S  | 2,681           | 4,813         | 29.7 | 40.8            |

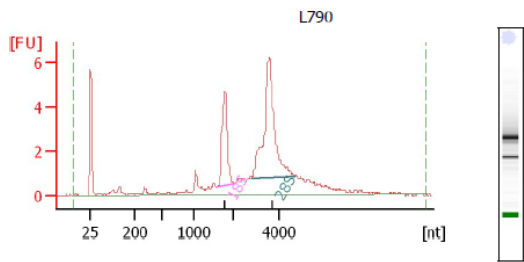

**Overall Results for sample 10 : L790**

RNA Area: 61.4  
 RNA Concentration: 101 ng/ul  
 rRNA Ratio [28s / 18s]: 2.2  
 RNA Integrity Number (RIN): 9.5 (A.01.01)  
 Result Flagging Color:    
 Result Flagging Label: RIN: 9.50

**Fragment table for sample 10 : L790**

| Name | Start Size [nt] | End Size [nt] | Area | % of total Area |
|------|-----------------|---------------|------|-----------------|
| 18S  | 1,579           | 2,106         | 8.9  | 14.5            |
| 28S  | 2,833           | 4,636         | 19.6 | 31.9            |

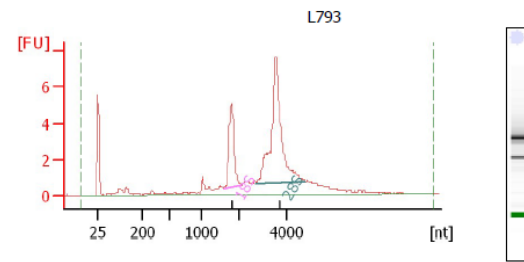

**Overall Results for sample 11 : L793**

RNA Area: 63.7  
 RNA Concentration: 105 ng/ul  
 rRNA Ratio [28s / 18s]: 2.6  
 RNA Integrity Number (RIN): 9.7 (A.01.01)  
 Result Flagging Color:    
 Result Flagging Label: RIN: 9.70

**Fragment table for sample 11 : L793**

| Name | Start Size [nt] | End Size [nt] | Area | % of total Area |
|------|-----------------|---------------|------|-----------------|
| 18S  | 1,577           | 2,074         | 9.4  | 14.7            |
| 28S  | 2,712           | 4,838         | 24.2 | 38.0            |





Acrobat Document



Acrobat Document
