# Supplementary material
Source: PubMed Central journal article supplement (PMC7228131)
Supplement: ehp6262.smcontents.508.pdf [file ehp6262.smcontents.508.pdf]

**Note to readers with disabilities:** *EHP* strives to ensure that all journal content is accessible to all readers. However, some figures and Supplemental Material published in *EHP* articles may not conform to [508 standards](#) due to the complexity of the information being presented. If you need assistance accessing journal content, please contact [ehp508@niehs.nih.gov](mailto:ehp508@niehs.nih.gov). Our staff will work with you to assess and meet your accessibility needs within 3 working days.

### **Supplemental Material**

#### **Evaluating the Role of the Steroid and Xenobiotic Receptor (SXR/PXR) in PCB-153 Metabolism and Protection against Associated Adverse Effects during Perinatal and Chronic Exposure in Mice**

Riann Jenay Egusquiza, Maria Elena Ambrosio, Shuyi Gin Wang, Kaelen Marie Kay, Chunyun Zhang, Hans-Joachim Lehmler, and Bruce Blumberg

#### **Table of Contents**

**Table S1.** Breeding Results.

**Table S2.** qPCR primer sequences.

**Table S3.** Proportion of deaths at 5 weeks of age in WT, hSXRki, and SXRKO mice exposed to PCB-153 or vehicle in chronic exposure study.

**Table S4.** Wild-type blood parameters over time in chronic exposure study.

**Table S5.** SXRKO blood parameters over time in chronic exposure study.

**Figure S1.** Blood hemoglobin levels throughout lifespan.

**Figure S2.** Relative liver and spleen weights of dams and pups from perinatal PCB-153 exposure study.

**Figure S3.** Gene Ontology (GO) term enrichment of spleen RNA-seq data set comparing SXRKO mice exposed to PCB-153 vs SXRKO mice exposed to vehicle (DMSO) in perinatal exposure study.

**Figure S4.** qPCR validation of select differentially expressed genes (DEGs) related to erythrocyte development and heme metabolism in the spleen.

**Figure S5.** Correlation plots of mRNA expression of erythrocyte development and heme metabolism genes with level of erythropoiesis in the spleen of SXRKO mice exposed to PCB-153.

**Figure S6. PCB-153 *ex vivo* hemolysis assay.**

**Figure S7. qPCR validation of differentially expressed genes (DEGs) related to oxidative stress in the spleen of SXRKO mice exposed to PCB-153 vs vehicle (DMSO).**

**Figure S8. DNA repair genes in the spleen of WT and SXRKO mice exposed to vehicle or PCB-153.**

**Figure S9. Gene Ontology (GO) term enrichment of liver RNA-seq dataset comparing SXRKO vs wild-type mice exposed to vehicle (DMSO).**

**Figure S10. Differential expression of genes related to transmembrane transporter activity between WT and SXRKO mice with DMSO and PCB-153 exposure.**

**Figure S11. Differential expression of various UGT and SULT genes between livers of WT and SXRKO mice with DMSO and PCB-153 exposure.**

**Figure S12. Tumor images, body weights, and spleen weights of mice chronically exposed to PCB-153.**

**RNA-seq script**

**RNA quality: Bioanalyzer (Agilent Bioanalyzer 2100) results for RNA used for RNA-seq**

**Additional File- Excel Document**
